# The Hippo pathway transcriptional co-activator YAP is involved in head regeneration and bud development in *Hydra*

1 **Manu Unni<sup>1</sup>, Puli Chandramouli Reddy<sup>1</sup> and Sanjeev Galande <sup>\*1</sup>**

2 <sup>1</sup> Centre of Excellence in Epigenetics, Department of Biology, Indian Institute of Science Education  
3 and Research, Pune, India

4 **\* Correspondence:**

5 Corresponding Author

6 [sanjeev@iiserpune.ac.in](mailto:sanjeev@iiserpune.ac.in)

7 **Keywords: *Hydra*, Hippo Pathway, YAP, Regeneration.**

8 **Abstract**

9 The Hippo signaling pathway has been shown to be involved in the regulation of cellular identity,  
10 cell/tissue size maintenance and mechanotransduction. The Hippo pathway consists of a kinase  
11 cascade which determines the nucleo-cytoplasmic localization of YAP in the cell. YAP is the effector  
12 protein in the Hippo pathway which acts as a transcriptional cofactor for TEAD. Phosphorylation of  
13 YAP upon activation of the Hippo pathway prevents it from entering the nucleus and hence abrogates  
14 its function in transcription of target genes. In Cnidaria, the information on the regulatory roles of the  
15 Hippo pathway is virtually lacking. Here, we report for the first time the existence of a complete set  
16 of Hippo pathway core components in *Hydra*. By studying their phylogeny and domain organization,  
17 we report evolutionary conservation of the components of the Hippo pathway. Protein modelling  
18 suggested conservation of YAP-TEAD interaction in *Hydra*. We also characterized the expression  
19 pattern of the homologs of *yap*, *hippo*, *mob* and *sav* in *Hydra* using whole mount RNA in situ  
20 hybridization and report their possible role in stem cell maintenance. Immunofluorescence assay  
21 revealed that *Hvul*\_YAP expressing cells occur in clusters in the body column and are excluded in  
22 the terminally differentiated regions. The YAP expressing cells are recruited early during head  
23 regeneration and budding implicating the Hippo pathway in early response to injury or establishment  
24 of oral fate. These cells exhibit a non-clustered existence at the site of regeneration and budding,  
25 indicating the involvement of a new population of YAP expressing cells during oral fate  
26 specification. Collectively, we posit that the Hippo pathway is an important signaling system in

27 *Hydra*, its components are ubiquitously expressed in the *Hydra* body column, and may play crucial  
28 role in *Hydra* oral fate specification.

## 29 **Introduction**

30 The ability of the cells to come together and act in a coordinated fashion helped organisms evolve  
31 from solitary single-cell based forms to extremely complex and specialized multicellular organisms.  
32 Signaling pathways which allow cell-cell communication in a highly specific and spatio-temporal  
33 manner enabled the advent of multicellularity. This is evident while studying ontogenesis.

34 Considering the sheer number of cell-types present in a complex organism such as humans, it comes  
35 as a surprise that the development of an organism from a zygote to a fully formed adult is controlled  
36 by a complex interplay of merely 10 main classes of signaling pathways (Perrimon et al., 2012).

37 These include- Notch, Wnt, Hedgehog, TGF $\beta$ /BMP, Receptor-tyrosine kinase (RTK), Hippo, NF-  
38  $\kappa$ B, JAK-STAT, JNK & Nuclear receptor signaling pathway family.

39 Multicellularity arose about 400-1000 million years ago on earth (Butterfield, 2000) independently in  
40 at least 16 different eukaryotic lineages which led to complex multicellular taxa like metazoa, Fungi  
41 and Embryophyta (Butterfield, 2000; Brunet and King, 2017). Considering the bilaterians as the most  
42 complex and diverse multicellular clade, a basic ‘Developmental Toolkit’ required for generation,  
43 organization and maintenance of multicellular structures can be assessed. The origin of these  
44 developmental tools which include transcription factors, signaling pathways, cell adhesion and cell  
45 polarity related genes can be traced back to basal metazoans (Tweedt and Erwin, 2015). A detailed  
46 analysis of these development toolkits, body plan and differential germ layers and a diverse cell-type  
47 system indicates Cnidarians are arguably the first phylum to evolve and exhibit features which  
48 underlie the traits commonly seen in Bilateria. Cnidarians exhibit an oral-aboral body axis polarity  
49 with a diploblastic germ layer organization. These germ layers in cnidarians have been reported to  
50 form myoepithelial cells, nerve-net of sensory/ganglion neuronal cells, gastric cells, germline cells  
51 and cnidocytes which are the defining feature of the phylum. Studies in the past few decades have  
52 shown clearly that these primitive organisms display highly complex developmental programs and  
53 toolkits which are commonly found in the bilaterians.

54 Among the cnidarians, *Hydra* is the best-characterized model. *Hydra* is a freshwater polyp known to  
55 exhibit tremendous regenerating potential with a capability to regenerate even from reaggregated  
56 cells of dissociated polyps (Gierer et al., 1972). It has been a classical model for developmental and

57 regeneration biology for more than two centuries and has contributed immensely towards the  
58 understanding of morphogen mediated processes and understanding various cell signaling pathways  
59 (Reddy et al., 2019b). Among the ten developmentally important signaling pathways as discussed  
60 above, seven of them have been shown to be functional according to the studies on *Hydra*. Many  
61 components of the Wnt signaling have been reported in *Hydra* and their role has been established to  
62 be important in the regulation of head organizer activity (Hobmayer et al., 2000). Many components  
63 of Notch signaling are present in *Hydra* and have been reported to be important in the boundary  
64 formation in tissues (Sprinzak et al., 2010; Münder et al., 2013). The TGF $\beta$  superfamily of signaling  
65 pathway has also been reported to be crucial for *Hydra* developmental signaling such as during  
66 tentacle formation, foot formation, symmetry breaking (Reinhardt et al., 2004; Rentzsch et al., 2007;  
67 Watanabe et al., 2014). Members of the RTK family of signaling pathways - VEGF, FGF and Ephrin  
68 have been shown to be crucial for regeneration in *Hydra* (Tischer et al., 2013; Krishnapati and  
69 Ghaskadbi, 2014). NF- $\kappa$ B has been reported to be important for early regenerative time points in  
70 *Hydra* (Franzenburg et al., 2012; Wenger et al., 2014). While their role is presently thought to be  
71 innate immunity/inflammation-related, its direct developmental regulation is yet to be established.  
72 JNK in *Hydra* has been found to be crucial in nematocyte differentiation and regulation of TLR-  
73 signaling (Philipp et al., 2005; Franzenburg et al., 2012). Among the nuclear receptor family of  
74 signaling pathways, Retinoblastoma gene has been found to be expressed in almost all cell types in  
75 *Hydra* but its specific role has not been deciphered (Schenkelaars et al., 2018). Another nuclear  
76 receptor protein, NR3E has been found to be expressed in *Hydra* and is predicted to respond to the  
77 parasterol A, a cnidarian A-ring aromatic steroid (Khalturin et al., 2018). Among the three remaining  
78 developmentally important signaling pathways yet to be reported in *Hydra* are- Hedgehog, JAK-  
79 STAT and Hippo signaling.

80

81 Hippo pathway has emerged as a major player for the orchestration of spatio-temporal regulation of  
82 cell differentiation, proliferation, tissue size control, and apoptosis. These capabilities enable the  
83 Hippo pathway to be important in the regulation of morphogenesis and tissue or organ regeneration.  
84 It was first described and reported in *Drosophila* while screening for tumour suppressor genes in  
85 1995 (Xu et al., 1995). However, it was only in 2005 when Yorkie (Yki), a transcription co-activator,  
86 was linked to Hippo signaling, and the importance of the Hippo pathway in regulating transcriptional  
87 landscape was truly realized (Huang et al., 2005). Yes-associated protein, also known as YAP, is a

88 highly conserved mammalian homolog of the *Drosophila* Yki. The Hippo core components are  
89 kinases which phosphorylates YAP through a cascade, which represses its transcriptional activity by  
90 preventing its nuclear transportation and hence its interaction with transcription factors like TEAD  
91 (Fulford et al., 2018). Upon phosphorylation, YAP is sequestered in the cytoplasm through 14-3-3  
92 interaction or undergo ubiquitination for its degradation. The core components of Hippo  
93 characterized in *Drosophila* consists of Ser/Thr kinases- Hippo (Hpo) and Warts (Wts); and their  
94 adapter proteins- Salvador (Sav) and Mats. In mammals, the equivalent set of factors is named as-  
95 Mst, Lats, Sav and Mob, respectively. At the cellular and molecular levels, the Hippo pathway and its  
96 functions are highly conserved between invertebrates and vertebrates.

97 There has been a paucity of literature to date about Hippo signaling in basal metazoans. The role of  
98 Hippo signaling in highly regenerative organisms like *Hydra* is unknown. A recent study in another  
99 cnidarian reported that *Clytia hemispherica* has all the core components of Hippo pathway and  
100 CheYki has cell proliferation regulatory function. Hence, it is pertinent to characterize the homologs  
101 of core Hippo pathway components in *Hydra* to understand their role in *Hydra* regeneration and cell  
102 proliferation and differentiation. A recent study has reported the presence of core components of the  
103 Hippo pathway in *Nematostella* (Hilman and Gat, 2011), suggesting that this pathway has fairly  
104 conserved ancient origin during the evolution of multicellular organisms. Here, using a combination  
105 of bioinformatic analysis and molecular cloning, we report the existence of a complete set of core  
106 Hippo pathway components in *Hydra*. Using domain analysis and 3D protein modelling, we show  
107 that these homologs have a conserved domain and motif architecture indicating a possible conserved  
108 interactive signaling network. Whole-mount *in situ* hybridization (WISH) analysis revealed that these  
109 genes are expressed across the body column with a few gene-specific variations. Adapting CheYki  
110 specific antibody for immunofluorescence assay of *Hydra* YAP, we show that nuclear localized YAP  
111 occurs as clustered cells across the body column with no expression in the regions which are  
112 terminally differentiated. We show that the YAP expressing cells are recruited to the regenerating tip  
113 and early buds. Further, we report the existence of a separate non-clustered nuclear localized YAP  
114 expressing cell population at the hypostomal region which may be involved in oral fate specification  
115 and maintenance.

116

117

118

## 119 **Materials and Methods**

### 120 **Animal culture**

121 Clonal culture of *Hydra vulgaris* Ind-Pune (Reddy et al., 2011) was maintained in *Hydra* medium by  
122 following standard methods at 18±1°C (Horibata et al., 2004). Polyps were fed daily with freshly  
123 hatched *Artemia nauplii* larvae and washed 6–8 h after feeding. For regeneration experiment, *Hydra*  
124 polyps starved for 24 hrs were decapitated just below the tentacle base and allowed to regenerate till  
125 0, 1, 2, 4 and 8 hours post amputation (hpa). The polyps were then fixed and processed for  
126 immunofluorescence assay. For budding experiment, *Hydra* polyps starved for 24 hrs were collected  
127 at different stages of bud development. These were then fixed and processed for immunofluorescence  
128 assay. The different stages of budding were identified and labelled as reported previously (Otto and  
129 Campbell, 1977).

130

### 131 **Identification of Hippo pathway homologs in *Hydra***

132 *Hydra magnipapillata* genome draft comprising 82.5% of 1.05 Gbp sequenced genome available as  
133 Refseq was initially used for identifying Hippo Pathway core components (Chapman et al., 2010).  
134 This assembly turned out to be incomplete and we were unable to fish out any homologs. An in-  
135 house transcriptome assembly generated in the Galande laboratory (Reddy et al., 2019a) was  
136 therefore used for the present study. To further improve the assembly, the in-house transcriptome was  
137 merged with the NCBI RefSeq to generate a hybrid assembly. The hybrid assembly was found to be  
138 99.6 % complete as compared to 95.7% exhibited by NCBI RefSeq (Reddy et al., 2019a). Using the  
139 stand-alone NCBI BLAST program, hits of homologs of Hippo pathway core components were  
140 identified (Madden, 2013). To confirm the hits, Reverse BLAST was performed. Finding a hit of a  
141 homolog in different phyla or species would confirm the homolog status. To further confirm, the  
142 amino acid sequences of these homologs were searched in HMMER (Hmmer, RRID:SCR\_005305)  
143 for affirmation based on the hits returned (Potter et al., 2018). Once the homologs were identified,  
144 further analyzed for domain organization by SMART (SMART, RRID:SCR\_005026) (Letunic et al.,  
145 2002). After manual evaluation of the domain organization, the domain architecture was constructed  
146 to scale using DOG 2.0 software (Ren et al., 2009).

147

## 148 **Molecular phylogenetic trees**

149 Sequences from different representative phyla were collected based on protein BLAST searches using  
150 Human YAP sequence as query. The collected sequences were aligned using MUSCLE (Edgar, 2004).  
151 The alignment was trimmed using automated trimAl programme (Capella-Gutiérrez et al., 2009). This  
152 alignment was subjected for phylogenetic analysis using FastTree 2 to generate an approximately  
153 maximum likelihood (ML) tree (Price et al., 2010). This method was selected after testing PhyML and  
154 RaxML as FastTree 2 has given better confidence on branching points and this could be due to highly  
155 divergence nature of the sequences. This pipeline was implemented in online platform NGphylogeny.fr  
156 (Lemoine et al., 2018). Here, LG substitution model was used with Felsenstein's phylogenetic  
157 bootstrap with a value of 1000 (Lemoine et al., 2019). Phylogenetic tree was visualized by using iTOL  
158 webserver (Letunic and Bork, 2019). Tree was rooted using *Amphimedon queenslandica* YAP-like  
159 sequence as an outgroup. The domain organization analysis and visualization were carried out using  
160 DoMosaics software (Moore et al., 2014) using embedded HMMER3 tools (Mistry et al., 2013) and  
161 Pfam data. The sequences details were provided in Supplementary Table 1.

162 For the analysis of the rest of the Hippo pathway components, alignments and molecular  
163 phylogenetic trees of the protein sequences were carried out using MEGA 6.0 software (Tamura et  
164 al., 2013). MUSCLE algorithm was used for amino acid sequence alignment (Edgar, 2004). The  
165 alignment was graphically represented using Jalview (Waterhouse et al., 2009).

166

## 167 **Cloning of Hippo pathway homologs from *Hydra***

168 Total RNA was extracted from *Hydra* polyps starved for 48 hrs and cDNA was synthesized from  
169 total RNA using Improm-II reverse transcriptase system (Promega™) according to the  
170 manufacturer's instructions. Hippo pathway genes were amplified by polymerase chain reaction  
171 using Pfu DNA polymerase with the following primers:

172 *Hvul\_yap\_forward*: 5'ATGGATATGAATTCTACGCAACGGC3',

173 *reverse*: 5'CTACAACCAAGTCATATATGCATTAGGC3';

174 *Hvul\_tead\_forward*: 5'ATGGCGGAAACTGTCGAGATCC3',

175 *reverse*: 5'TCAGTCTCTGACTAATTTAAATATGTGGT3';

176 *Hvul\_hpo\_forward*:5'ATGTCTCGCAGTTTGAAGAAGTTGAG3',

177 reverse: 5'TTAAAAATTTGCTTGCCTGCGTT3';

178 *Hvul\_mob\_forward*:5'ATGAGTTTCCTGTTTGGCTCCA3',

179 reverse: 5'TTATTTATTAATTAACTTATCCATAAGTTC3';

180 *Hvul\_lats\_forward*:5'ATGGCAGCTAATAATCTTTTTAGTAG3',

181 reverse: 5'TCATACAAAAACAGGCAACTTGC3';

182 *Hvul\_sav\_forward*:5'ATGTTTAAGAAAAAGATATTATCAAAAACA3',

183 reverse: 5'TTAAACATGAGTTTTTTTAAAAGAAATACT3'

184 The PCR conditions: Initial denaturation at 94°C for 5 min, followed by 30 cycles of denaturation at  
185 94°C for 30 sec, annealing at the respective annealing temperatures (Ta) for 45 sec and extension at  
186 72°C for 45 sec with the final extension 72°C for 5 minutes. The PCR amplified products were gel  
187 eluted using Mini elute kit (Qiagen), followed by A-tailing reaction using KapaTaq enzyme and  
188 cloned in pGemT-Easy vector system (Promega™) or TOPO TA cloning vector as per the  
189 manufacturer's instructions. The recombinant plasmids were sequenced using sequencing primers  
190 and the nucleotide sequences of cloned genes were deposited at NCBI Genbank (*Hvul\_yap*-  
191 MW650883; *Hvul\_tead*- MW650884; *Hvul\_hpo*- MW650879; *Hvul\_mob*- MW650880; *Hvul\_lats*-  
192 MW650881 and *Hvul\_sav*- MW650882).

### 193 **Whole mount in situ hybridization**

194 Digoxigenin-labelled sense and antisense RNA probes were prepared by in vitro transcriptions using  
195 recombinant plasmids of target genes made as mentioned above (Roche Life Science) and used for in  
196 situ hybridization. Whole mount in situ hybridization was performed on the polyps as described by  
197 Martinez et. al., (1997) with the following changes (Martinez et al., 1997). The animals were relaxed  
198 for 2 min in 2% urethane. Treatment with proteinase-K was performed for an optimum of 15 min and  
199 heat-inactivation of the endogenous alkaline phosphatases was done at 70°C for 15 min in 1X SSC.  
200 Digoxigenin labelled RNA probes at a concentration of 200-600 ng/ml of the probe was used for  
201 hybridization at 59°C. The post-hybridization washes were performed using 1X SSC-HS gradients.  
202 After staining with BM-purple AP substrate for 30 min- 1 hr at room temperature, the animals were

203 mounted in 80% glycerol for imaging. Imaging was carried out using 10 X DIC objective lens with  
204 Axio Imager Z1 (Zeiss).

### 205 **Cryosectioning of WISH stained *Hydra* samples**

206 The stained polyps were rehydrated to PBS gradually through PBS: methanol gradient (25%, 50%,  
207 75%, and 100 % wash each for 10 mins). These polyps were then shifted to a 30 % sucrose solution  
208 by gradually taking it through 10 % and 20 % for 30 mins each. The polyps were left in 30 % sucrose  
209 overnight. These polyps were then embedded in 10 % PVP (polyvinyl pyrrolidone) by making cubes  
210 of PVP (1 x 1 x 2 cm<sup>3</sup>) made from aluminum foil cast. The embedded polyps were then sectioned (25  
211 µm thick) using Leica CM1950 – Cryostat. The sectioned ribbons were then collected on a glass slide  
212 and covered and sealed under a coverslip. The sectioned were then photographed under ZEISS Axio  
213 Zoom V16 apotome microscope.

### 214 **Analysis of expression of Hippo pathway components from single-cell transcriptome profile**

215 t-SNE plots and gene expression plots of Hippo pathway components were generated and extracted  
216 from the Single Cell Portal ([https://portals.broadinstitute.org/single\\_cell/study/SCP260/stem-cell-](https://portals.broadinstitute.org/single_cell/study/SCP260/stem-cell-differentiation-trajectories-in-Hydra-resolved-at-single-cell-resolution)  
217 [differentiation-trajectories-in-Hydra-resolved-at-single-cell-resolution](https://portals.broadinstitute.org/single_cell/study/SCP260/stem-cell-differentiation-trajectories-in-Hydra-resolved-at-single-cell-resolution)). In order to use the Single  
218 Cell Portal, gene IDs of Hippo pathway components were acquired through a BLAST search in the  
219 Juliano aepLRv2 nucleotide database via *Hydra* 2.0 Genome Project Portal  
220 (<https://research.nhgri.nih.gov/Hydra/sequenceserver/>). To determine the clusters of cells that express  
221 individual Hippo pathway components, differential gene expression was analyzed using edgeR,  
222 which is a tool to analyze RNA-seq data using the trimmed mean of M-values (TMM) method.  
223 Differential gene expression was calculated as fold change.

### 224 **Immunofluorescence staining**

225 A recently published paper reported the presence of Yorkie (YAP/Yki) in *Clytia hemispherica* and  
226 producing polyclonal antibody specific to CheYki in rabbit against the peptide  
227 FNRRTTWDDPRKAHS (Coste et al., 2016). This antibody along with the pre-immune serum was  
228 kindly gifted by Dr Michaël Manuel (Sorbonne Universités, Université Pierre et Marie Curie  
229 (UPMC), Institut de Biologie Paris-Seine (IBPS) CNRS). The antibody was validated by  
230 immunofluorescence analysis.



231 Immunofluorescence assay was performed as per the protocol is given in Takaku et. al., 2014  
232 (Takaku et al., 2014). *Hydra* polyps were starved at least for one day before fixation. Animals were  
233 relaxed in 2% urethane for 1-2 min and fixed in 4% paraformaldehyde (in 1XPBS) overnight at 4°C  
234 or 1 hr at RT. 1:100 concentration of primary antibody was used. 1:100 concentration of Invitrogen  
235 Alexa-conjugated secondary antibodies was used. Invitrogen Alexa 488 conjugated Phalloidin for  
236 staining. DAPI was used for nuclear staining. These samples were then imaged on ZEISS Axio Zoom  
237 V16 (for regeneration and whole animal images) or Andor Dragonfly Spinning Disc (for budding  
238 *Hydra*) microscopes.

## 239 **Modelling**

240 The 2.8 Å crystal structure of the human YAP-TEAD complex deposited on PDB (4RE1) was as a  
241 reference for modelling the TEAD binding domain and YAP binding domains of *Hydra* YAP-TEAD  
242 complex (Zhou et al., 2015). Modeller software (Webb and Sali, 2016) was used to build five  
243 optimum models based on 4RE1 in the multi-model mode. Among the five models, the model with  
244 minimum DOPE assessment score and maximum GA341 assessment score was chosen for the final  
245 analysis. The model was then visualized in CHIMERA for analysis, superpositioning and annotation  
246 (Pettersen et al., 2004). The non-covalent bond analysis was performed using Biovia Discovery  
247 Studio Visualizer (BIOVIA, 2017). The Binding energy calculations were performed using  
248 PRODIGY web server (Xue et al., 2016).

249

## 250 **Results**

### 251 **Characterization and phylogenetic analysis of *Hydra* Hippo pathway genes**

252 Core Hippo pathway homologs – *hippo/mst*, *mob*, *lats*, *sav*, *yap* and *tead* were identified from the in-  
253 house *Hydra* transcriptome using NCBI stand-alone BLAST (Reddy et al., 2019a). In mammals,  
254 *hippo*, *mob*, *lats* and *yap* have 2 paralogs each while *tead* has 4 paralogs. *Sav*, on the other hand, has  
255 no reported paralogs. The occurrence of these paralogs has been attributed to whole-genome  
256 duplication events correlated to certain fish species (Chen et al., 2019). Therefore, any species  
257 evolved earlier than fishes do not contain paralogs as reported for Hippo pathway genes. Conforming  
258 to these reports, *Hydra* consists of only one gene coding for each of the core Hippo pathway  
259 components. The *Hydra* Hippo pathway homologs were labelled as- *Hvul\_hpo*, *Hvul\_mob*,

260 *Hvul\_lats*, *Hvul\_sav*, *Hvul\_yap* and *Hvul\_tead*. The presence of these homologs in *Hydra* was  
261 confirmed by obtaining the corresponding amplicons from *Hydra* cDNA (Supplementary Figure 1).  
262 Upon determining the nucleotide percent identity with other reported model organisms used for  
263 studying the Hippo pathway, we find that *Hydra* had a higher percent identity with humans than  
264 *Drosophila* (Figure 1 B). *Hvul\_hpo* shows about 60 % identity with humans and 56 % identity with  
265 *Drosophila*. *Hvul\_sav* is comparatively less conserved with a 24 % identity with human and 22 %  
266 identity with *Drosophila*. *Hvul\_mob* is highly conserved across the animal phyla with about 84 %  
267 identity with humans and 83 % identity with *Drosophila*. *Hvul\_lats* shares 41.6 % identity with  
268 humans and 42 % identity with *Drosophila*. *Hvul\_yap* shows 34.6 % identity with humans and 34 %  
269 identity with *Drosophila*. *Hvul\_tead* exhibits about 65 % identity with humans and 59 % identity  
270 with *Drosophila*.

271 An earlier study performed the phylogenetic analysis of YAP homologues found in selective phyla  
272 (Hilman and Gat, 2011). However, this analysis did not cover majority of invertebrate phyla such as  
273 Annelida, Mollusca and Echinodermata. This could be due to lack of reliable data for the identification  
274 of the YAP homologues. Here, we have combined the phylogenetic analysis with predicted domain  
275 architecture. We used a YAP-like sequence found in *Amphimedon queenslandica* as an outgroup for  
276 rooting the tree. Additionally, a protein sequence with BLAST similarity from a unicellular Eukaryote  
277 (*Capsaspora owczarzaki*) was used for domain organization comparison. In this analysis, we observed  
278 that *Hydra* homologue of YAP exhibits a strong affinity to the chordate counterparts rather than non-  
279 chordate homologues (Figure 1C). An interesting observation after inclusion of multiple invertebrate  
280 phyla in the analysis is that they are highly diverged compared to the Cnidarian and Chordata species.  
281 This can be interpreted based on the weak branch support values (Figure 1C). Additionally, a molluscan  
282 homologue, *Sepia pharaonic* (SEPPH\_YAP) showed more similarity with *Drosophila* Yki and  
283 *Saccoglossus kowalevskii* homologue (SACKO\_YAP) showed more similarity with Echinodermata  
284 homologues (Figure 1C). Domain organization analysis has led to identification of variability in the N-  
285 terminal homology domain (FAM181). This region contains TEAD binding domain (TBD).  
286 Surprisingly, in *Capitella teleta* (Annelida), *Clytia hemisphaerica* (Cnidaria) and *Ciona intestinalis*  
287 (Chordata) the FAM181 domain could not be detected (Figure 1C). This could be due to the higher  
288 sequence divergence in this region.

289 A detailed domain analysis using SMART website for the amino acid sequence of Hippo pathway  
290 homologs revealed a highly conserved domain organization of the proteins analyzed which indicates

291 a fully functional pathway consisting of these core components (Figure 1 A). *Hvul\_HPO* domain  
292 analysis revealed conserved N-terminal Protein kinase domain (PKinase Domain) and a C-terminal  
293 SARAH (Salvador-RASSF-Hippo) domain. The presence of these domains indicates the conserved  
294 regulation of activation of *Hvul\_HPO* kinase activity (Glantschnig et al., 2002;Praskova et al.,  
295 2004;Boggiano et al., 2011). The *Hvul\_SAV* also can be seen to have conserved the SARAH domain  
296 required for orchestrating the reported scaffolding activity (Yin et al., 2013). *Hvul\_LATS* domain  
297 architecture indicates conservation of the hydrophobic motif (Motif: AFYEFTFRHFFDDGG) (a 40%  
298 hydrophobicity confirmed using web-based peptide analysis tool at  
299 [www.peptide2.com/N\\_peptide\\_hydrophobicity\\_hydrophilicity.php](http://www.peptide2.com/N_peptide_hydrophobicity_hydrophilicity.php)) containing the Threonine residue  
300 (T993) required for the activation of LATS by HIPPO phosphorylation (T1079 in humans)  
301 (Supplementary Figure 2A) (Hergovich et al., 2006;Ni et al., 2015). The MOB binding motif is  
302 highly conserved in *Hvul\_LATS* as compared to the human and mouse (Figure 2.4 B). The auto-  
303 activation T-loop (near S909 in human) of *Hvul\_LATS* is 100 % conserved (Motif:  
304 AHSLVGTPNYIAPEVL) near S830 (Supplementary Figure 2B) (Ni et al., 2015). *Hvul\_MOB* is  
305 highly conserved (84 % identity with human MOB) as compared to any other components of Hippo  
306 pathway homologs in *Hydra* indicating highly conserved function. The same site as reported for  
307 Human MOB is also highly conserved in *Hvul\_MOB* at T35 (Motif: LLKHAEATLGSGNLR)  
308 (Supplementary Figure 2C). This site is crucial for the release of LATS-MOB complex from the  
309 MST-SAV-LATS-MOB complex and further initiation of LATS auto-activation (Ni et al., 2015).  
310 *Hvul\_YAP* domain analysis revealed that it had a conserved TEAD-Binding Domain (TBD) and two  
311 WW domains. A serine phosphorylation prediction for YAP primary sequence was performed using  
312 GPS 2.1 web-based tool (Xue et al., 2010). Based on GPS prediction and manual curation,  
313 *Hvul\_YAP* is predicted to have LATS phosphorylation site at S74 (motif: PIHTRARSLPSNIGQ)  
314 and S276 (motif: YTAYMNSSVLGRGSS) homologous to the S127 (motif:  
315 PQHVRAHSSPASLQL) and S381 (motif: SDPFLNSGTYHSRDES) (Supplementary Figure 2D).  
316 Similar to mammals, a phosphodegron motif (DSGLDG) was identified immediately downstream to  
317 the S276 site (S381 in humans) which could be phosphorylated by CK1- $\gamma$  at S287 (S388 in humans)  
318 of *Hvul\_YAP* (Supplementary Figure 2E) (Zhao et al., 2010). These analyses indicated that the  
319 Hippo pathway effector protein YAP is well equipped for regulation by the LATS and CK1- $\gamma$ . With  
320 its defined TEAD binding domain and WW domain, it could interact with transcription factor TEAD  
321 and other reported PPXY domain-containing proteins.

322

### 323 **Structural features of YAP and TEAD interaction**

324 The Hippo effector protein YAP is known to elicit its biological function as transcription co-effector  
325 by interacting with transcription factors. Presently, YAP is known to interact with TEAD,  $\beta$ -catenin,  
326 SMAD, RUNX, p73 and ErbB4 for regulating their transcriptional responses as an activator or  
327 repressor (Strano et al., 2001; Komuro et al., 2003; Zhao et al., 2008; Szeto et al., 2016; Passaniti et  
328 al., 2017; Pan et al., 2018). Among these, YAP-TEAD interaction has been extensively studied and is  
329 known to be important for regulating cell growth and size as well as tissue architecture (Totaro et al.,  
330 2018). The interaction of YAP and TEAD was first shown to form through their specific interaction  
331 domains in 2001 (Vassilev et al., 2001). The structural features of this interaction in humans were  
332 first demonstrated in 2009 showing how the TEAD binding domain (TBD) in YAP (amino acids 53-  
333 99) interacted with the YAP binding domain (YBD) in the TEAD (position: amino acids 209-426)  
334 (Li et al., 2010). The YBD consists of 12  $\beta$  strands which arrange themselves into two  $\beta$  sheets in an  
335 opposing fashion to form a  $\beta$ -sandwich fold. The four  $\alpha$  helices from the YBD are arranged at the two  
336 ends of the  $\beta$ -sandwich fold for stabilizing the structure. The study showed that TBD-YBD  
337 interaction occurs over 3 interfaces. Each interface consisted of one of the following secondary  
338 structure of the TBD- the  $\beta$ 1 strand,  $\alpha$ 1 helix or  $\alpha$ 2 helix responsible for interacting with the globular  
339 YBD of the TEAD at the C-terminal. It was shown that the  $\beta$ 1 strand of TBD interacted with the  $\beta$ 7  
340 strand of the YBD (interface 1), The  $\alpha$ 1 helix from TBD interacted with  $\alpha$ 3 and  $\alpha$ 4 helices of the  
341 YBD (interface 2). The  $\alpha$ 2 of the TBD was bound to the YBD through its interaction with  $\alpha$ 1 and  $\alpha$ 2  
342 helices (interface 3) (Li et al., 2010).

343 Amino acid sequence alignment of the predicted YBD (amino acids 240-251) and predicted TBD  
344 (position: 1-58) of *Hvul*\_YAP and *Hvul*\_TEAD respectively with Human YAP and TEAD revealed  
345 71.2 % sequence identity (82.9 % sequence similarity) of YBD (Figure 2 A) and a 37.9 % sequence  
346 identity (56.9 % sequence similarity) of TBD (Figure 2 B) which indicates plausible structural  
347 conservation and hence interacting capability of TBD with YBD. To confirm the same, the 3D  
348 structure of the YBD and TBD of *Hvul*\_YAP and *Hvul*\_TEAD was modelled using MODELLER  
349 software (Webb and Sali, 2016). The modelling was done based on the 4RE1 X-ray diffraction  
350 structure deposited at Research Collaboratory for Structural Bioinformatics PDB (RCSB PDB-  
351 <https://www.rcsb.org/>) which models the interaction of human homologs of TBD and YBD at a  
352 resolution of 2.20 Å. The model generated from the *Hydra* homologs was superimposed on the  
353 human YAP (hYAP) and hTEAD structure from 4RE1 and was found to highly structurally similar  
354 (RMSD for *Hvul*\_YAP:hYAP- 0.338 Å and for *Hvul*\_TEAD:hTEAD- 0.310 Å) and indicated a

355 conserved interaction capability of *Hvul*\_YAP and *Hvul*\_TEAD (Figure 2 C). The modeled YBD-  
356 TBD complex of *Hydra* clearly shows how three different regions- Region 1, Region 2 and Region 3  
357 of TBD (purple) interacts with the globular YBD (green) by non-covalent bond interactions  
358 (Supplementary Figure 3A). The Region 1 interface consisting of TBD  $\beta$ 1 (amino acids 10-17) and  
359 YBD  $\beta$ 7 (358-363) strands interact with seven hydrogen bonds in the human complex, forming an  
360 anti-parallel  $\beta$  sheet (Li et al., 2010). In *Hydra* there are only six hydrogen bonds (green dotted lines)  
361 due to the presence of Gln18 in  $\beta$ 1 instead of Gly59 found in humans (Li et al., 2010), introducing a  
362 rotation in the preceding Arg which disables it from forming a hydrogen bond (Supplementary Figure  
363 3B). The 2<sup>nd</sup> interface (Region 2) has the  $\alpha$ 1 helix of the TBD (amino acids 20-32) fitting right into  
364 the binding groove of the YBD formed by the  $\alpha$ 3 and  $\alpha$ 4 helices of the YBD (amino acids 385-409)  
365 (Supplementary Figure 3C). Similar to humans; this region is mainly mediated by hydrophobic  
366 interactions with the  $\alpha$ 1 helix of the TBD having conserved LXXLF motif for hydrophobic groove  
367 binding (Li et al., 2010). This interaction mainly consists of Leu24, Leu27 and Phe28 from TBD and  
368 Try386, Lys393 and Val406 of YBD (pink dotted lines). In *Hydra*, few hydrogen bonds (green dotted  
369 lines) not found in humans may lead to a more stable interface. The 3<sup>rd</sup> region (3<sup>rd</sup> interface) consists  
370 of a twisted coil and  $\alpha$ 2 helix (amino acids 42-58) from the TBD interacting deeply with the pocket  
371 formed by the  $\alpha$ 1 helix,  $\beta$ 4,  $\beta$ 11 and  $\beta$ 12 helices of the YBD. This region was found to be  
372 indispensable for the YAP-TEAD complex formation in humans (Li et al., 2010). The region 3 in  
373 *Hydra* contains the hydrophobic side chains of the TBD – Phe44 (Met86 in humans), Leu49, Pro50  
374 and Phe53 forming extensive van der Waals interactions with the YBD of TEAD at Glu280, Ala281,  
375 Ile282, Gln286, Ile287, Leu312, Leu316, Val431, His444 & Phe446 (Supplementary Figure 3D). The  
376 interface is further strengthened by multiple hydrogen bonds (indicated in green dotted lines) –  
377 TBD\_Arg47:YBD\_Gln286, TBD\_Lys48:YBD\_Gln286, TBD\_Ser52:YBD\_Glu280 and  
378 YBD\_Lys314:TBD\_Phe53. The hydrophobic interactions in region 3 consists of Phe53, Pro50 and  
379 Phe44 from TBD and Lys314, Glu408 and Phe446 from the YBD. While the hydrophobic  
380 interactions involving Pro56 and Pro57 from TBD with Trp316 and His444 respectively help to push  
381 the proline residues out of the hydrophobic pocket. One of the unique aspects that can be predicted  
382 from the model is that *Hydra* region 3 YAP-TEAD complex is able to form two salt bridges (orange  
383 dotted lines) - TBD\_Arg47:YBD\_Asp289:YBD\_Asp289 and  
384 TBD\_Lys48:YBD\_Asp283:YBD\_Asp451. The human complex only forms a salt bridge at  
385 TBD\_Arg89:YBD\_Asp249: YBD\_Asp249. These observations indicate a more stable YAP-TEAD  
386 interaction in *Hydra* as compared to the humans. To shed more light on the same, the  
387 computationally calculated binding energy of the YAP-TEAD complex between the two organisms

388 were compared using the web-based server PRODIGY (PROtein binDing enerGY prediction) in  
389 Protein-protein mode (Xue et al., 2016). The  $\Delta G$  of YAP-TEAD complex in humans is about -6.8  
390 kcal mol<sup>-1</sup> while the complex in *Hydra* has a value of -14.7 kcal mol<sup>-1</sup>. This large difference in the  
391 binding energy supports the possibility that the YAP-TEAD complex in *Hydra* is much more stable.

## 392 **Expression analysis of the Hippo pathway genes in *Hydra***

### 393 ***Hvul\_yap* expression in *Hydra***

394 The expression pattern of *Hvul\_yap* in *Hydra* polyp was studied by whole-mount *in situ*  
395 hybridization (WISH). The staining pattern observed from the whole polyp indicates low-level  
396 expression throughout the body with higher expression at the tentacle base and tip of the early stages  
397 of the developing new bud (Figure 3A). A closer look indicates that the expression is stronger in the  
398 endodermal cells as compared to the ectodermal cells (Figure 3B - E). *yap* expression in the early  
399 stages of bud development indicates its role in budding. Higher *yap* expression at the region of high  
400 mechanical stress such as the tentacle base, early budding tip and mature bud-parent polyp boundary  
401 indicates a probable ancient mechano-sensory role of YAP in *Hydra*. These polyps were  
402 cryosectioned to obtain a closer look at the types of cells expressing *yap* (Supplementary Figure 4).  
403 The images of these sections revealed cells in doublets, quadruplets and groups of cells among other  
404 stained cells indicating their interstitial stem cell origin, plausibly nematoblast and nests of  
405 nematoblasts.

### 406 **Expression pattern of *Hvul\_hpo*, *Hvul\_mob* and *Hvul\_sav* genes**

407 An RNA WISH study of *Hvul\_hpo* showed expression throughout the gastric region (Figure 4A). No  
408 expression was observed at the differentiated zones of hypostome, tentacle or basal disk which might  
409 indicate a role in stem-cell maintenance or differentiation but not in terminally differentiated cells.  
410 There is a slight reduction in expression at the budding zone and early buds which might indicate the  
411 antagonistic role of HPO towards YAP activity in areas of high mechanical stress as reported in other  
412 organisms. *Hvul\_hpo* expression can also be seen at mature bud-parent polyp boundary indicating a  
413 fine-tuning of regulation of Hippo pathway-dependent during bud detachment. *Hvul\_mob* expression  
414 showed a similar pattern to that of *Hvul\_yap* with a distinct down-regulation at the basal disk region  
415 of both adult and budding *Hydra* (Figure 4B). *Hvul\_sav* expression reflected the expression pattern  
416 of *Hvul\_hpo* indicating a similar role. It can also be noted that there is marked reduction in  
417 expression at the budding region, early and late buds, unlike the *Hvul\_hpo* (Figure 4C).

418 A recent study reported high-throughput sequencing of the transcriptome of 24,985 single *Hydra*  
419 cells using Drop-seq and identified the molecular signatures of various cell states and types (Siebert  
420 et al., 2019). The differential expression of the Hippo pathway components and their pattern were  
421 examined using the Single Cell Portal. The expression patterns of *Hvul\_yap*, *Hvul\_tead*, *Hvul\_hpo*,  
422 *Hvul\_lats*, *Hvul\_sav* & *Hvul\_mob* were queried. From the single-cell data, *Hvul\_yap* expression was  
423 found to be insignificantly dysregulated or differentially expressed between cell-types  
424 (Supplementary Figure 5). Surprisingly, such a trend was commonly observed between all the other  
425 Hippo pathway components namely, *Hvul\_tead*, *Hvul\_hpo*, *Hvul\_lats*, *Hvul\_sav* & *Hvul\_mob*. This  
426 indicates a slight disparity with the WISH data. This could be due to lack of enough resolution from  
427 the datasets used. The data showed here only represent a relative fold-change between the cells and  
428 may indicate that the expression levels are relatively the same between the cells. The WISH data also  
429 indicate that most of the cells express almost all types of Hippo pathway components, yet at the same  
430 time, we see that they are excluded from some regions. These may be extremely stage-specific and  
431 hence difficult to be picked up in sc-RNAseq of whole polyps. Nevertheless, the findings from  
432 analyzing single-cell data argue in favor of the fact that the Hippo pathway components are essential  
433 for cells and need to be expressed in almost all cell-types. Their activity might be regulated at the  
434 protein level, and hence a protein-based analysis is essential to better understand the regulation of  
435 Hippo pathway in *Hydra*.

436

### 437 **Protein Expression analysis of the *Hvul\_YAP* in *Hydra***

#### 438 **Region-specific and cell-type expression of *Hvul\_YAP* in *Hydra***

439 The *Clytia hemispherica* specific Yorkie (CheYki) antibody was raised against a peptide from the  
440 WW1 region of CheYorkie in rabbit (Coste et al., 2016). The CheYki peptide sequence was extracted  
441 from the Marine Invertebrate Model Database (MARIMBA) and was used to align with *Hvul\_YAP*  
442 using CLUSTAL Omega. The full protein alignment showed just a 39.36 % identity. However, a  
443 peptide-specific (immunogen) alignment gave a 60 % identity which raised the probability of cross  
444 reactivity of this antibody against *Hvul\_YAP* (Supplementary Figure 6 A). To test the same, an  
445 immunofluorescence assay (IFA) was run using CheYki antibody or pre-immune serum. The IFA  
446 yielded a robust signal for CheYki antibody as compared to the negative control (Supplementary  
447 Figure 6 B). Examination of localization of YAP expressing cells revealed a pattern similar to what  
448 we found in YAP ISH (Figure 5 A). The expression was seen more or less throughout the body. The

449 base of the tentacle showed high expression similar to that seen in ISH but the number of YAP  
450 expressing cells drops in hypostomal region and the inter-tentacle zone. Unlike the pattern of  
451 transcripts seen in the ISH, the YAP expressing cells were depleted at the basal disk region.

452 The body column of *Hydra* is uniformly interspersed with YAP expressing cells (Figure 6). These  
453 cells can be seen almost exclusively in groups (duplets, quadruplets or more). There were specific  
454 patterns of these groups which looked similar to the ones seen in cryosections of ISH samples  
455 (Supplementary Figure 4). The expression was clear for nuclearized YAP while the cytoplasmically  
456 localized YAP were dispersed and difficult to observe. A careful analysis of cells expressing YAP  
457 based on the staining intensity and intercellular distance, as seen in IFA indicates different subsets of  
458 cells. Based on the YAP expression intensity, there seem to be cells exhibiting high expression (Blue  
459 arrow), medium expression (yellow arrow) and low expression (green arrow). Based on the cellular  
460 clustering, cell types can be divided into cells which are duplets or quadruplets (orange arrows)  
461 which may be interstitial stem cell undergoing first and second mitotic division. There are also  
462 clusters of cells which are arranged into a linear file whose identity is difficult to judge (red arrows).  
463 Yellow arrows indicate clusters of cells which looks like part of a nest of nematoblasts. These nest  
464 cells are typically arranged into 8-16 cell-clusters. As can be noticed here, these clusters are not  
465 completely YAP expressing, and only a subset of these express YAP. This may indicate that these  
466 cells are expressing only at certain stages of nematoblast differentiation. Such similar clusters can be  
467 observed even in the high-level YAP expressing cells (blue arrows) indicating a yet different subset  
468 of nematoblast cells. A different population of cells shows extra-nuclear staining (white arrow).  
469 These stains might be non-specific since they are localized in cysts similar to that seen in  
470 desmonemes and stenoteles. These results suggest that at least some of the YAP expressing cells  
471 have interstitial cell origin. While inner hypostome (area immediate around the mouth) and the  
472 tentacles are virtually devoid of YAP expressing cells, we find that there are a few non-clustered  
473 YAP expressing cells at the region interstitial to the tentacle bases and the outer hypostome (Figure 5  
474 and Supplementary Figure 7B). Such an expression pattern may indicate a role of YAP in tissue  
475 compartment-boundary regulation for hypostomal and tentacle development and/or maintenance of  
476 gene networks in *Hydra*. Such a role of Yki (YAP) has been recently proposed in *Drosophila* in wing  
477 imaginal disc development by regulating the expression of Hox genes and Hedgehog signaling  
478 (Bairzin et al., 2020).



479 **YAP expressing cells are recruited to newly developing buds but are excluded from the**  
480 **hypostomal region upon initiation of differentiation**

481 Cellular dynamics of YAP expressing cells during *Hydra* bud development was studied using  
482 immunofluorescence assay. Buds at different points of bud-development from early to late stages  
483 were observed (Stage 3, 4, 6 and 9). It was clear that the YAP expressing cells moved into the early  
484 bud with an expression pattern very similar to that found in the body column. Such pattern is  
485 persistent throughout the budding stages in the body column of the newly developed bud. The most  
486 interesting changes happening to the YAP expressing cells in a bud is at the hypostomal region. The  
487 YAP expressing cells near the distal bud tip were found to be non-clustered as compared to the rest  
488 of the lower bud region. At stage 3, the bud-tip where the head organizer has been set for establishing  
489 the new body axis for bud, YAP expressing cells seems to be depleted (Figure 7A). This pattern is  
490 even more conspicuous from stage 4 onwards (Figure 7B-D, Supplementary Figure 7A). From stage  
491 9 onwards, the expression pattern similar to the adult *Hydra* is established where we see non-  
492 clustered YAP expressing cells seen sparsely at the boundaries between the hypostome and the  
493 tentacle base (Figure 7D, Supplementary Figure 7B). The appearance of non-clustered cells in these  
494 regions may indicate a different sub-type of YAP expressing cells having a role in head organizer  
495 maintenance in *Hydra*. Another interesting point to note is that YAP expressing cells are completely  
496 depleted at the basal disk (Figure 5), hypostome and tentacles. This observation may indicate an  
497 important antagonistic role of YAP signaling in tissues with terminally differentiated cells. The lack  
498 of YAP expressing cells even at the early developmental stages of tentacle development in a new bud  
499 (Supplementary Figure 7B) and at the Adult-bud boundary where the basal disk will form  
500 (Supplementary Figure 7C) further suggests the possibility of Hippo pathway in cell differentiation.

501 **YAP expressing cells are early responders to head amputation**

502 Immunostaining for YAP on decapitated polyps shed light on the participation of YAP expressing  
503 cells during early regeneration (Figure 7). YAP expressing cells can be observed occupying the site  
504 of injury within one hour of amputation. These cells increase in density as time progresses until 4  
505 hours post-amputation (hpa). Since wound healing takes approximately 1-2 hpa, the YAP expressing  
506 cells may migrate along with the epithelial cells during the wound-healing phase. An increase in  
507 density might be caused by either further migration of the YAP expressing cells from the body  
508 column or by division from the pre-existing cells at the site of injury. The interesting observation to  
509 note is that the population of YAP expressing cells at the site of injury until 4 hpa is similar to the

510 population seen in the body column of *Hydra* (green arrows). This changes after 8 hpa as the YAP  
511 expressing cells at the distal-most region of the regenerating tip assumes a new cell-type  
512 characteristic. These cells are non-clustered and look similar to the cells observed at the budding tip  
513 and at the region around the boundaries of hypostome and tentacle base in adult *Hydra*. They can  
514 now be seen as individual cells arranged arbitrarily at the tip. Since YAP is a known  
515 mechanotransducer, these cells are either differentiated from the cells migrated from the body  
516 column or are cells assuming a new phenotype in response to the mechanical change in the cellular  
517 environment due to lack of ECM and physical disruption of cells (Shimizu et al., 2002). The  
518 dynamics of YAP expressing cells in the regenerating tips indicate that they are recruited to the site  
519 of injury early during the regeneration and are probably early responders of mechanical changes.

520

## 521 **Discussion**

522 Detailed characterization of the Hippo pathway and its components in pre-bilaterians has been  
523 extremely sparse. There have been few studies reporting the presence of Hippo homologs in these  
524 primitive organisms. *Capsaspora owczarzaki*, a single-celled eukaryote is the most primitive  
525 organism predicted to have a complete set of functional core Hippo pathway homologs indicative of a  
526 holozoan origin of the functional pathway (Sebé-Pedrós et al., 2012). Another study confirmed the  
527 presence of Hippo pathway components in a Ctenophore species: *Pleurobrachia pileus* and a  
528 Cnidarian species *Clytia hemispherica* (Coste et al., 2016). While this study reported an absence of  
529 Yki in Ctenophores, it showed that the Yki in *Clytia* are conserved for the regulation of cell  
530 proliferation and growth. In this study, we have for the first time identified and characterized a  
531 complete set of core Hippo pathway components in *Hydra vulgaris* through bioinformatic analysis  
532 and cloning. The current phylogenetic analysis is in congruence with previous report that  
533 *Nematostella vectensis* homologue is more similar to complex vertebrates (Hilman and Gat, 2011). In  
534 fact, all the Cnidarian homologues exhibit higher similarity with the chordate YAP sequences. This  
535 suggests that YAP sequences evolved close to the emergence of the chordate homologs and might  
536 exhibit similar properties observed in these organisms. Domain organization analysis indicates  
537 divergence in the N-terminal homology domain of YAP (FAM181) in different lineages. This  
538 suggests the clade specific role of the FAM181 region, probably in the interactions with TEAD like  
539 or other proteins. This further indicates taxon-specific modification took place in the FAM181 region  
540 and might play lineage specific functions. We show that the Hippo pathway components are more or

541 less uniformly expressed throughout the polyp tissues barring a few regions in a gene-specific  
542 manner like budding zone, early buds, extremities of the polyps such as tentacle tips or basal disks.  
543 Considering the studies in bilaterians indicating that these components are all tightly controlled to  
544 regulate the cell cycle and cell differentiation, it can be easily seen why these genes are expressed  
545 uniformly in all tissues. Since the extremities of the polyps are terminally differentiated, they  
546 probably do not need these genes for the functions mentioned above and are already set to perform its  
547 designated functions without needing any change. The analysis of amino acid sequences of these  
548 genes to predict the secondary structure and 3D tertiary protein models have also given us some  
549 insightful results. Domain architecture of all the Hippo pathway proteins shows that their architecture  
550 is well conserved in Cnidaria, which confirms an ancient establishment and evolution of the pathway  
551 in the basal metazoans. The 3D modelling of YAP's TBD and TEAD's YBD in *Hydra* using the  
552 published crystal structure of their Human homolog predicts a similar interaction capability of YAP  
553 and TEAD in *Hydra*. Our analysis revealed that the YAP-TEAD complex is highly stable in *Hydra*.  
554 This raises the possibility that the YAP-TEAD interaction was robust in primitive metazoans, and as  
555 the signaling pathway evolved, the stability of the complex was presumably partially compromised to  
556 accommodate the promiscuous nature of YAP in more complex organisms. This indirectly indicates  
557 that the functions of the Hippo pathway or YAP signaling reported in bilaterians may have been  
558 established as early as in Cnidarians and hence may have played in developing important  
559 characteristics of multicellular organisms like cell-type divergence, body-axis development, germ-  
560 layer differentiation etc.

561 In *Clytia*, it was found that Yki was nuclearized at the tentacle base where there are highly  
562 proliferating cells, while they are inhibited in the tentacles where the cells are differentiated (Coste et  
563 al., 2016). Using the antibodies used in the same study, we were able to study the protein-level  
564 expression of YAP in *Hydra*. We find that even though *Hvul\_yap* is expressed uniformly throughout  
565 the polyp, only a few cells have *Hvul\_YAP* in the "active form" (nuclearized). We find that these  
566 nuclearized YAP are more or less uniformly spread throughout the polyp. YAP expression is almost  
567 absent or not nuclearized in the terminally differentiated regions including the tentacles, hypostome  
568 or basal disk. An interesting observation is the presence of YAP expressing cells at the tentacle base  
569 forming a circle (Figure 5 and Supplementary Figure 7B). This can be considered homologous to the  
570 expression pattern seen in *Clytia* which may be speculated as necessary for terminal differentiation of  
571 cells while crossing the body column-tentacle boundary. Another possibility can be the mechanical  
572 activation due to physical stress experienced at the tentacle base due to movement of tentacles or

573 anatomical constraints. Most of these cells in the body column can be seen in groups or colonies.  
574 Cellular features and arrangements of YAP positive cells are indicative of interstitial stem cell origin.  
575 Cells like desmonemes and stenoteles are mechano-sensitive, and YAP may regulate their  
576 development and function. Another interesting observation is the presence of a non-clustered group  
577 of cells in the outer hypostomal region (Supplementary Figure 7B). Such an expression pattern raises  
578 many interesting possibilities. It is reported that the ectodermal cells in the hypostome is maintained  
579 separately from the gastric region (Dübel et al., 1987;Dübel, 1989). The inner hypostomal ring  
580 consists exclusively of terminally differentiated cells (Dübel, 1989). The stationary region in the  
581 hypostome (the outer hypostomal ring) contains a population of the ectodermal epithelial cells that  
582 retains its proliferative potential which contribute exclusively to the cell-types in the entire  
583 hypostomal region. Once the hypostome is specified, there are no contributions from the gastric  
584 ectoderm towards hypostomal cells unless the hypostome is lost upon amputation. A unique  
585 population of YAP expressing cells (non-clustered cells) in the outer hypostomal region and not at  
586 the inner region may indicate the possibility of these cells being maintained in their undifferentiated  
587 proliferative stem cell state by YAP for specific hypostomal functions. An identical population of  
588 cells can be found at the regenerating tip (Figure 8-white arrows) and during early bud development.  
589 These observations raise the possibility of these cells having a crucial role in establishing and  
590 maintaining the head organizer. This regulation may well be mechanically activated upon amputation  
591 or biochemically with pre-existing cues. The appearance of the non-clustered cells at the regenerating  
592 tip at 8 hrs is interesting since the expression of one of the variants of *brachyury* (*HyBra2*) coincides  
593 with the same time point in the regenerating *Hydra* ((Bielen et al., 2007); Unni et al., unpublished  
594 findings).The same study also shows early expression of *Bra* during bud formation. Interestingly, the  
595 expression pattern of *HyBra* is exclusively at the hypostomal region encompassing both the outer and  
596 inner hypostome (Technau and Bode, 1999; Bielen et al., 2007). *Bra* is known to be a direct  
597 responder to consolidation Wnt/ $\beta$ -catenin signaling (Yamaguchi et al., 1999). *HyBra* has also been  
598 implicated in the establishment of the head organizer in *Hydra* (Technau and Bode, 1999). Hence,  
599 this may mean that appearance of *HyBra* may coincide with the true setting up of the head organizer.  
600 This raises the enticing prospect of YAP expressing cells at the outer hypostome region to restrict the  
601 head organizer-related function of Brachyury to the inner hypostome ring by exerting its tissue  
602 boundary regulation functions via the hedgehog pathway (Bairzin et al., 2020).Taken together with  
603 the expression pattern of YAP in developing bud, adult polyp and the regenerating tip, consolidates  
604 the possibility of YAP in the establishment and maintenance of the head organizer function in *Hydra*.

605 This study shows that the Hippo pathway is an important signaling pathway capable of regulating the  
606 cellular differentiation and tissue regeneration in *Hydra*. A more in-depth study of YAP signaling  
607 under these contexts might reveal interesting insights into the evolution of the functions associated  
608 with complex organisms. YAP can act as a mechanotransducer and has been shown to play a role in  
609 regulating various morphogenetic and developmental functions. This aspect of YAP is only starting  
610 to be fully understood and have been poorly studied in basal metazoans to understand its origins. A  
611 detailed study in *Hydra* to understand the same will shed light on the fundamental aspects of how  
612 tissue mechanics plays a role in regulating cell function.

613

#### 614 **Conflict of Interest**

615 *The authors declare that the research was conducted in the absence of any commercial or financial*  
616 *relationships that could be construed as a potential conflict of interest.*

#### 617 **Author Contributions**

618 Conceptualization: M.K.U., P.C.R., S.G.; Methodology: M.K.U., P.C.R., S.G.; Validation: M.K.U.,  
619 P.C.R., S.G.; Formal analysis: M.K.U., P.C.R., S.G.; Investigation: M.K.U. & P.C.R.;  
620 Resources: S.G.; Writing - original draft: M.K.U., P.C.R., S.G.; Writing - review & editing: M.K.U.,  
621 P.C.R., S.G.; Visualization: M.K.U., P.C.R., S.G.; Supervision: S.G.; Project administration: S.G.;  
622 Funding acquisition: S.G.

#### 623 **Funding**

624 This work was supported by the Centre of Excellence in Epigenetics program (BT/01/COE/09/07) of the  
625 Department of Biotechnology, Government of India and the JC Bose National Fellowship from the  
626 Science and Engineering Research Board (JCB/2019/000013) (S.G.). The authors acknowledge funding  
627 from IISER Pune - intramural (S.G); Department of Biotechnology postdoctoral fellowship (P.C.R); and  
628 Early Career Fellowship (IA/E/16/1/503057) (P.C.R.); fellowships from the University Grants  
629 Commission (UGC) (M.U.); EMBO Short-term fellowship and Infosys Foundation for international  
630 travel support (M.U.)

631

632

## 633 Acknowledgments

634 Authors wish to thank Dr Michaël Manuel for providing the kind gift of CheYki antibody, and Dr Inna  
635 Solomonov for useful comments on the manuscript and Dr Neeladri Sen for his help with protein  
636 modelling. We thank Prof Irit Sagi to allow use of facilities in her lab to perform *Hydra* YAP budding  
637 immunofluorescence assay and Mr Assaf Hanuna for maintaining *Hydra* culture at the Weizmann  
638 Institute of Science. We would like to thank Dr Yoseph Addadi for assistance with imaging samples  
639 using Andor Dragonfly Spinning Disc Microscope, Dr Rachel Paul for assistance with whole-mount RNA  
640 *in situ* hybridization of *Hvul\_mob*, and the IISER-Pune Microscopy facility.

## 641 Data Availability Statement

642 The datasets for this study can be found in the Supplementary Table 1. This includes the protein  
643 sequences used for phylogenetic analysis, the mRNA sequences and protein sequences of the *Hydra*  
644 Hippo pathway core homologs in separate tabs of the excel sheet.

## 645 References

- 646 Bairzin, J.C., Emmons-Bell, M., and Hariharan, I.K. (2020). The Hippo pathway coactivator Yorkie  
647 can reprogram cell fates and create compartment-boundary-like interactions at clone margins.  
648 *Science advances* 6, eabe8159.
- 649 Bielen, H., Oberleitner, S., Marcellini, S., Gee, L., Lemaire, P., Bode, H.R., Rupp, R., and Technau,  
650 U. (2007). Divergent functions of two ancient Hydra Brachyury paralogues suggest specific  
651 roles for their C-terminal domains in tissue fate induction. *Development* 134, 4187-4197.
- 652 Biovia, D.S. (2017). BIOVIA Discovery Studio 2017 R2: A comprehensive predictive science  
653 application for the Life Sciences. San Diego, CA, USA <http://accelrys.com/products/collaborative-science/biovia-discovery-studio>.
- 654
- 655 Boggiano, J.C., Vanderzalm, P.J., and Fehon, R.G. (2011). Tao-1 phosphorylates Hippo/MST  
656 kinases to regulate the Hippo-Salvador-Warts tumor suppressor pathway. *Developmental cell*  
657 21, 888-895.
- 658 Brunet, T., and King, N. (2017). The origin of animal multicellularity and cell differentiation.  
659 *Developmental cell* 43, 124-140.
- 660 Butterfield, N.J. (2000). Bangiomorpha pubescens n. gen., n. sp.: implications for the evolution of  
661 sex, multicellularity, and the Mesoproterozoic/Neoproterozoic radiation of eukaryotes.  
662 *Paleobiology* 26, 386-404.
- 663 Capella-Gutiérrez, S., Silla-Martínez, J.M., and Gabaldón, T. (2009). trimAl: a tool for automated  
664 alignment trimming in large-scale phylogenetic analyses. *Bioinformatics* 25, 1972-1973.
- 665 Chapman, J.A., Kirkness, E.F., Simakov, O., Hampson, S.E., Mitros, T., Weinmaier, T., Rattei, T.,  
666 Balasubramanian, P.G., Borman, J., and Busam, D. (2010). The dynamic genome of Hydra.  
667 *Nature* 464, 592-596.

- 668 Chen, Y., Han, H., Seo, G., Vargas, R., Yang, B., Chuc, K., Zhao, H., and Wang, W. (2019). The  
669 Hippo pathway origin and its oncogenic alteration in evolution. *bioRxiv*, 837500.
- 670 Coste, A., Jager, M., Chambon, J.-P., and Manuel, M. (2016). Comparative study of Hippo pathway  
671 genes in cellular conveyor belts of a ctenophore and a cnidarian. *EvoDevo* 7, 4.
- 672 Dübel, S. (1989). Cell differentiation in the head of Hydra. *Differentiation* 41, 99-109.
- 673 Dübel, S., Hoffmeister, S.A., and Schaller, H.C. (1987). Differentiation pathways of ectodermal  
674 epithelial cells in hydra. *Differentiation* 35, 181-189.
- 675 Edgar, R.C. (2004). MUSCLE: multiple sequence alignment with high accuracy and high throughput.  
676 *Nucleic acids research* 32, 1792-1797.
- 677 Franzenburg, S., Fraune, S., Künzel, S., Baines, J.F., Domazet-Lošo, T., and Bosch, T.C. (2012).  
678 MyD88-deficient Hydra reveal an ancient function of TLR signaling in sensing bacterial  
679 colonizers. *Proceedings of the National Academy of Sciences* 109, 19374-19379.
- 680 Fulford, A., Tapon, N., and Ribeiro, P.S. (2018). Upstairs, downstairs: spatial regulation of Hippo  
681 signalling. *Current opinion in cell biology* 51, 22-32.
- 682 Gierer, A., Berking, S., Bode, H., David, C.N., Flick, K., Hansmann, G., Schaller, C.H., and  
683 Trenkner, E. (1972). "Regeneration of hydra from reaggregated cells", in: *Nature/New*  
684 *Biology*).
- 685 Glantschnig, H., Rodan, G.A., and Reszka, A.A. (2002). Mapping of MST1 kinase sites of  
686 phosphorylation: activation and autophosphorylation. *Journal of Biological Chemistry* 277,  
687 42987-42996.
- 688 Guindon, S., and Gascuel, O. (2003). A simple, fast, and accurate algorithm to estimate large  
689 phylogenies by maximum likelihood. *Systematic biology* 52, 696-704.
- 690 Hergovich, A., Schmitz, D., and Hemmings, B.A. (2006). The human tumour suppressor LATS1 is  
691 activated by human MOB1 at the membrane. *Biochemical and biophysical research*  
692 *communications* 345, 50-58.
- 693 Hilman, D., and Gat, U. (2011). The evolutionary history of YAP and the hippo/YAP pathway.  
694 *Molecular biology and evolution* 28, 2403-2417.
- 695 Hobmayer, B., Rentzsch, F., Kuhn, K., Happel, C.M., Von Laue, C.C., Snyder, P., Rothbacher, U.,  
696 and Holstein, T.W. (2000). WNT signalling molecules act in axis formation in the  
697 diploblastic metazoan Hydra. *Nature* 407, 186.
- 698 Horibata, Y., Sakaguchi, K., Okino, N., Iida, H., Inagaki, M., Fujisawa, T., Hama, Y., and Ito, M.  
699 (2004). Unique catabolic pathway of glycosphingolipids in a hydrozoan, Hydra  
700 magnipapillata, involving endoglycoceramidase. *Journal of Biological Chemistry* 279, 33379-  
701 33389.
- 702 Huang, J., Wu, S., Barrera, J., Matthews, K., and Pan, D. (2005). The Hippo signaling pathway  
703 coordinately regulates cell proliferation and apoptosis by inactivating Yorkie, the Drosophila  
704 Homolog of YAP. *Cell* 122, 421-434.
- 705 Jones, D.T., Taylor, W.R., and Thornton, J.M. (1992). The rapid generation of mutation data matrices  
706 from protein sequences. *Bioinformatics* 8, 275-282.
- 707 Khalturin, K., Billas, I.M., Chebaro, Y., Reitzel, A.M., Tarrant, A.M., Laudet, V., and Markov, G.V.  
708 (2018). NR3E receptors in cnidarians: A new family of steroid receptor relatives extends the

- 709 possible mechanisms for ligand binding. *The Journal of steroid biochemistry and molecular*  
710 *biology* 184, 11-19.
- 711 Komuro, A., Nagai, M., Navin, N.E., and Sudol, M. (2003). WW domain-containing protein YAP  
712 associates with ErbB-4 and acts as a co-transcriptional activator for the carboxyl-terminal  
713 fragment of ErbB-4 that translocates to the nucleus. *Journal of Biological Chemistry* 278,  
714 33334-33341.
- 715 Krishnapati, L.-S., and Ghaskadbi, S. (2014). Identification and characterization of VEGF and FGF  
716 from Hydra. *International Journal of Developmental Biology* 57, 897-906.
- 717 Lemoine, F., Correia, D., Lefort, V., Doppelt-Azeroual, O., Mareuil, F., Cohen-Boulakia, S., and  
718 Gascuel, O. (2019). NGPhylogeny. fr: new generation phylogenetic services for non-  
719 specialists. *Nucleic Acids Research* 47, W260-W265.
- 720 Lemoine, F., Entfellner, J.-B.D., Wilkinson, E., Correia, D., Felipe, M.D., De Oliveira, T., and  
721 Gascuel, O. (2018). Renewing Felsenstein's phylogenetic bootstrap in the era of big data.  
722 *Nature* 556, 452-456.
- 723 Letunic, I., and Bork, P. (2019). Interactive Tree Of Life (iTOL) v4: recent updates and new  
724 developments. *Nucleic acids research* 47, W256-W259.
- 725 Letunic, I., Goodstadt, L., Dickens, N.J., Doerks, T., Schultz, J., Mott, R., Ciccarelli, F., Copley,  
726 R.R., Ponting, C.P., and Bork, P. (2002). Recent improvements to the SMART domain-based  
727 sequence annotation resource. *Nucleic acids research* 30, 242-244.
- 728 Li, Z., Zhao, B., Wang, P., Chen, F., Dong, Z., Yang, H., Guan, K.-L., and Xu, Y. (2010). Structural  
729 insights into the YAP and TEAD complex. *Genes & development* 24, 235-240.
- 730 Madden, T. (2013). "The BLAST sequence analysis tool," in *The NCBI Handbook [Internet]. 2nd*  
731 *edition*. National Center for Biotechnology Information (US)).
- 732 Martinez, D.E., Dirksen, M.-L., Bode, P.M., Jamrich, M., Steele, R.E., and Bode, H.R. (1997).  
733 Budhead, a fork head/HNF-3 homologue, is expressed during axis formation and head  
734 specification in hydra. *Developmental biology* 192, 523-536.
- 735 Mistry, J., Finn, R.D., Eddy, S.R., Bateman, A., and Punta, M. (2013). Challenges in homology  
736 search: HMMER3 and convergent evolution of coiled-coil regions. *Nucleic acids research*  
737 41, e121-e121.
- 738 Moore, A.D., Held, A., Terrapon, N., Weiner 3rd, J., and Bornberg-Bauer, E. (2014). DoMosaics:  
739 software for domain arrangement visualization and domain-centric analysis of proteins.  
740 *Bioinformatics* 30, 282-283.
- 741 Münder, S., Tischer, S., Grundhuber, M., Büchels, N., Bruckmeier, N., Eckert, S., Seefeldt, C.A.,  
742 Prexl, A., Käsbauer, T., and Böttger, A. (2013). Notch-signalling is required for head  
743 regeneration and tentacle patterning in Hydra. *Developmental biology* 383, 146-157.
- 744 Ni, L., Zheng, Y., Hara, M., Pan, D., and Luo, X. (2015). Structural basis for Mob1-dependent  
745 activation of the core Mst–Lats kinase cascade in Hippo signaling. *Genes & development* 29,  
746 1416-1431.
- 747 Otto, J.J., and Campbell, R.D. (1977). Budding in Hydra attenuata: bud stages and fate map. *Journal*  
748 *of Experimental Zoology* 200, 417-428.



- 749 Pan, J.-X., Xiong, L., Zhao, K., Zeng, P., Wang, B., Tang, F.-L., Sun, D., Guo, H.-H., Yang, X., and  
750 Cui, S. (2018). YAP promotes osteogenesis and suppresses adipogenic differentiation by  
751 regulating  $\beta$ -catenin signaling. *Bone research* 6, 1-12.
- 752 Passaniti, A., Brusgard, J.L., Qiao, Y., Sudol, M., and Finch-Edmondson, M. (2017). "Roles of  
753 RUNX in Hippo pathway signaling," in *RUNX Proteins in Development and Cancer*.  
754 Springer), 435-448.
- 755 Perrimon, N., Pitsouli, C., and Shilo, B.-Z. (2012). Signaling mechanisms controlling cell fate and  
756 embryonic patterning. *Cold Spring Harbor perspectives in biology* 4, a005975.
- 757 Pettersen, E.F., Goddard, T.D., Huang, C.C., Couch, G.S., Greenblatt, D.M., Meng, E.C., and Ferrin,  
758 T.E. (2004). UCSF Chimera—a visualization system for exploratory research and analysis.  
759 *Journal of computational chemistry* 25, 1605-1612.
- 760 Philipp, I., Holstein, T.W., and Hobmayer, B. (2005). HvJNK, a Hydra member of the c-Jun NH2-  
761 terminal kinase gene family, is expressed during nematocyte differentiation. *Gene expression*  
762 *patterns* 5, 397-402.
- 763 Potter, S.C., Luciani, A., Eddy, S.R., Park, Y., Lopez, R., and Finn, R.D. (2018). HMMER web  
764 server: 2018 update. *Nucleic acids research* 46, W200-W204.
- 765 Praskova, M., Khoklatchev, A., Ortiz-Vega, S., and Avruch, J. (2004). Regulation of the MST1  
766 kinase by autophosphorylation, by the growth inhibitory proteins, RASSF1 and NORE1, and  
767 by Ras. *Biochemical Journal* 381, 453-462.
- 768 Price, M.N., Dehal, P.S., and Arkin, A.P. (2010). FastTree 2—approximately maximum-likelihood  
769 trees for large alignments. *PLoS one* 5, e9490.
- 770 Reddy, P.C., Barve, A., and Ghaskadbi, S. (2011). Description and phylogenetic characterization of  
771 common hydra from India. *Current Science* 101, 736-738.
- 772 Reddy, P.C., Gungi, A., Ubhe, S., Pradhan, S.J., Kolte, A., and Galande, S. (2019a). Molecular  
773 signature of an ancient organizer regulated by Wnt/ $\beta$ -catenin signalling during primary body  
774 axis patterning in Hydra. *Communications Biology* 2, 1-11.
- 775 Reddy, P.C., Gungi, A., and Unni, M. (2019b). "Cellular and Molecular Mechanisms of Hydra  
776 Regeneration," in *Evo-Devo: Non-model Species in Cell and Developmental Biology*.  
777 Springer), 259-290.
- 778 Reinhardt, B., Broun, M., Blitz, I.L., and Bode, H.R. (2004). HyBMP5-8b, a BMP5-8 orthologue,  
779 acts during axial patterning and tentacle formation in hydra. *Developmental biology* 267, 43-  
780 59.
- 781 Ren, J., Wen, L., Gao, X., Jin, C., Xue, Y., and Yao, X. (2009). DOG 1.0: illustrator of protein  
782 domain structures. *Cell research* 19, 271.
- 783 Rentzsch, F., Guder, C., Vocke, D., Hobmayer, B., and Holstein, T.W. (2007). An ancient chordin-  
784 like gene in organizer formation of Hydra. *Proceedings of the National Academy of Sciences*  
785 104, 3249-3254.
- 786 Schenkelaars, Q., Tomczyk, S., Wenger, Y., Ekundayo, K., Girard, V., Buzgariu, W., Austad, S., and  
787 Galliot, B. (2018). "Hydra, a model system for deciphering the mechanisms of aging and  
788 resistance to aging," in *Conn's Handbook of Models for Human Aging*. Elsevier), 507-520.
- 789 Sebé-Pedrós, A., Zheng, Y., Ruiz-Trillo, I., and Pan, D. (2012). Premetazoan origin of the hippo  
790 signaling pathway. *Cell reports* 1, 13-20.

- 791 Shimizu, H., Zhang, X., Zhang, J., Leontovich, A., Fei, K., Yan, L., and Sarras, M.P. (2002).  
792 Epithelial morphogenesis in hydra requires de novo expression of extracellular matrix  
793 components and matrix metalloproteinases. *Development* 129, 1521-1532.
- 794 Siebert, S., Farrell, J.A., Cazet, J.F., Abeykoon, Y., Primack, A.S., Schnitzler, C.E., and Juliano, C.E.  
795 (2019). Stem cell differentiation trajectories in Hydra resolved at single-cell resolution.  
796 *Science* 365, eaav9314.
- 797 Sprinzak, D., Lakhanpal, A., Lebon, L., Santat, L.A., Fontes, M.E., Anderson, G.A., Garcia-Ojalvo,  
798 J., and Elowitz, M.B. (2010). Cis-interactions between Notch and Delta generate mutually  
799 exclusive signalling states. *Nature* 465, 86.
- 800 Strano, S., Munariz, E., Rossi, M., Castagnoli, L., Shaul, Y., Sacchi, A., Oren, M., Sudol, M.,  
801 Cesareni, G., and Blandino, G. (2001). Physical interaction with Yes-associated protein  
802 enhances p73 transcriptional activity. *Journal of Biological Chemistry* 276, 15164-15173.
- 803 Szeto, S.G., Narimatsu, M., Lu, M., He, X., Sidiqi, A.M., Tolosa, M.F., Chan, L., De Freitas, K.,  
804 Bialik, J.F., and Majumder, S. (2016). YAP/TAZ are mechanoregulators of TGF- $\beta$ -Smad  
805 signaling and renal fibrogenesis. *Journal of the American Society of Nephrology* 27, 3117-  
806 3128.
- 807 Takaku, Y., Hwang, J.S., Wolf, A., Böttger, A., Shimizu, H., David, C.N., and Gojobori, T. (2014).  
808 Innexin gap junctions in nerve cells coordinate spontaneous contractile behavior in Hydra  
809 polyps. *Scientific reports* 4, 3573.
- 810 Tamura, K., Stecher, G., Peterson, D., Filipinski, A., and Kumar, S. (2013). MEGA6: molecular  
811 evolutionary genetics analysis version 6.0. *Molecular biology and evolution* 30, 2725-2729.
- 812 Technau, U., and Bode, H.R. (1999). HyBra1, a Brachyury homologue, acts during head formation in  
813 Hydra. *Development* 126, 999-1010.
- 814 Tischer, S., Reineck, M., Söding, J., Münder, S., and Böttger, A. (2013). Eph receptors and ephrin  
815 class B ligands are expressed at tissue boundaries in Hydra vulgaris. *International Journal of*  
816 *Developmental Biology* 57, 759-765.
- 817 Totaro, A., Panciera, T., and Piccolo, S. (2018). YAP/TAZ upstream signals and downstream  
818 responses. *Nature cell biology* 20, 888-899.
- 819 Tweedt, S.M., and Erwin, D.H. (2015). "Origin of metazoan developmental toolkits and their  
820 expression in the fossil record," in *Evolutionary transitions to multicellular life*. Springer),  
821 47-77.
- 822 Vassilev, A., Kaneko, K.J., Shu, H., Zhao, Y., and Depamphilis, M.L. (2001). TEAD/TEF  
823 transcription factors utilize the activation domain of YAP65, a Src/Yes-associated protein  
824 localized in the cytoplasm. *Genes & development* 15, 1229-1241.
- 825 Watanabe, H., Schmidt, H.A., Kuhn, A., Höger, S.K., Kocagöz, Y., Laumann-Lipp, N., Özbek, S.,  
826 and Holstein, T.W. (2014). Nodal signalling determines biradial asymmetry in Hydra. *Nature*  
827 515, 112.
- 828 Waterhouse, A.M., Procter, J.B., Martin, D.M., Clamp, M., and Barton, G.J. (2009). Jalview Version  
829 2—a multiple sequence alignment editor and analysis workbench. *Bioinformatics* 25, 1189-  
830 1191.
- 831 Webb, B., and Sali, A. (2016). Comparative protein structure modeling using MODELLER. *Current*  
832 *protocols in bioinformatics* 54, 5.6. 1-5.6. 37.

- 833 Wenger, Y., Buzgariu, W., Reiter, S., and Galliot, B. (Year). "Injury-induced immune responses in  
834 Hydra", in: *Seminars in immunology*: Elsevier), 277-294.
- 835 Xu, T., Wang, W., Zhang, S., Stewart, R.A., and Yu, W. (1995). Identifying tumor suppressors in  
836 genetic mosaics: the *Drosophila* lats gene encodes a putative protein kinase. *Development*  
837 121, 1053-1063.
- 838 Xue, L.C., Rodrigues, J.P., Kastritis, P.L., Bonvin, A.M., and Vangone, A. (2016). PRODIGY: a web  
839 server for predicting the binding affinity of protein–protein complexes. *Bioinformatics* 32,  
840 3676-3678.
- 841 Xue, Y., Liu, Z., Cao, J., Ma, Q., Gao, X., Wang, Q., Jin, C., Zhou, Y., Wen, L., and Ren, J. (2010).  
842 GPS 2.1: enhanced prediction of kinase-specific phosphorylation sites with an algorithm of  
843 motif length selection. *Protein Engineering, Design & Selection* 24, 255-260.
- 844 Yamaguchi, T.P., Takada, S., Yoshikawa, Y., Wu, N., and McMahon, A.P. (1999). T (Brachyury) is a  
845 direct target of Wnt3a during paraxial mesoderm specification. *Genes & development* 13,  
846 3185-3190.
- 847 Yin, F., Yu, J., Zheng, Y., Chen, Q., Zhang, N., and Pan, D. (2013). Spatial organization of Hippo  
848 signaling at the plasma membrane mediated by the tumor suppressor Merlin/NF2. *Cell* 154,  
849 1342-1355.
- 850 Zhao, B., Li, L., Tumaneng, K., Wang, C.-Y., and Guan, K.-L. (2010). A coordinated  
851 phosphorylation by Lats and CK1 regulates YAP stability through SCF $\beta$ -TRCP. *Genes &*  
852 *development* 24, 72-85.
- 853 Zhao, B., Ye, X., Yu, J., Li, L., Li, W., Li, S., Yu, J., Lin, J.D., Wang, C.-Y., and Chinnaiyan, A.M.  
854 (2008). TEAD mediates YAP-dependent gene induction and growth control. *Genes &*  
855 *development* 22, 1962-1971.
- 856 Zhou, Z., Hu, T., Xu, Z., Lin, Z., Zhang, Z., Feng, T., Zhu, L., Rong, Y., Shen, H., and Luk, J.M.  
857 (2015). Targeting Hippo pathway by specific interruption of YAP-TEAD interaction using  
858 cyclic YAP-like peptides. *The FASEB Journal* 29, 724-732.

859

860

## 861 **Figure Legends:**

862 **Figure 1: Identification of Hippo pathway homologs in *Hydra*.** **A.** Domain architecture of the  
863 homologs as visualized using DOG 2.0. **B.** Depicts the percent identity of *Hydra* homolog with  
864 *Drosophila* and Human. **C.** Phylogenetic tree and domain organization of YAP homologs across the  
865 animal phyla. The phylogenetic analysis was carried out on NGphylogeny.fr webserver and the tree  
866 was generated using FastTree 2 method. Here, the phylogenetic tree was rooted at Amphimedon  
867 queenslandica YAP-like sequence (AMPQU). Domain organization analysis was carried out using  
868 DoMosaics software. Branch support values are displayed at the branching points. Different phyla are  
869 highlighted with distinct colours. *Hydra* YAP homologue (*HVUL* YAP) is highlighted in red colour

870 font. A UNIPROT style abbreviations for organism names are used. Sequence details are provided in  
871 the Supplementary Table 1.

872 **Figure 2: YAP-TEAD interaction domain is structurally conserved in *Hydra*.** **A.** Sequence  
873 alignment of human and *Hydra* TEAD YAP-binding domains (YBD) showing 71.2 % sequence  
874 identity. **B.** Sequence alignment of human and *Hydra* YAP TEAD-binding domains (TBD) showing  
875 37.9 % sequence identity. The alignment consensus shows conserved amino acid residues at a given  
876 position. If there is no conservation, the position is labelled as X. Colour code: amino acid  
877 residues with positive charge- red, negative charge-blue and neutral- green. **C.** Structural  
878 superposition of predicted *Hvul*\_TEAD YBD and *Hvul*\_YAP TBD with YBD and TBD complex in  
879 Human (PDB:4RE1) showing highly conserved  $\beta$ - strands and  $\alpha$ - helices structural placement.  
880 Important  $\alpha$ - helices and  $\beta$ - strands are indicated with their number identification which are involved  
881 in the interaction of YBD and TBD. Colour code: Red- *Hvul*\_YAP TBD, Blue- *HVUL*\_TEAD YBD,  
882 Green- human YAP TBD (PDB ID-4RE1), Purple- human TEAD YBD (PDB ID-4RE1). **D)**  
883 Interaction of YBD (green color) with the TBD (purple color) in *Hydra* modelled using 4RE1  
884 structure showing how the globular YBD (depicted in surface features) is bound by TBD (depicted as  
885 ribbon) through interactions at three different regions -region 1, region 2, and region 3. The amino  
886 acid side chains from TBD are represented as sticks for understanding their role in the interaction.

887 **Figure 3: *Hvul\_yap* expression analysis in *Hydra*.** Whole-mount in situ hybridization of *Hvul\_yap*  
888 expression at **A.** Region across the polyp (inset shows polyp probed with a sense RNA probe). **B.**  
889 Head, **C.** basal disk, **D.** mid-stage bud, **E.** early bud/ late bud foot. The scale bar is 500  $\mu$ m long.

890 **Figure 4: *Hvul\_hpo*, *Hvul\_mob* and *Hvul\_sav* expression analysis in *Hydra*.** Whole mount in situ  
891 hybridization of **A.** *Hvul\_hpo*, **B.** *Hvul\_mob* and **C.** *Hvul\_sav* expression for the whole polyp. The  
892 insets on the right indicate negative controls probed with sense RNA probe. The scale bar is 500  $\mu$ m  
893 long.

894 **Figure 5: Expression of *Hvul\_YAP* in *Hydra*.** Immunofluorescence assay of *Hvul\_YAP* performed  
895 using anti-CheYki antibody showing localization of YAP positive cells at various locations in an  
896 adult polyp. The red fluorescent dye shows Alexa 594 staining of YAP and the blue dye shows DAPI  
897 staining of nucleus. The hypostomal region is indicated by a green box, the tentacle base is indicated  
898 by an orange box. The body column is indicated by a blue box and basal disc area is indicated by a  
899 red box.

900 **Figure 6: Types of *Hvul*\_YAP expressing cells in *Hydra*.** Immunofluorescence assay of *Hvul*\_YAP  
901 performed using anti-CheYki antibody on macerated cells at 60X. **A.** This panel shows cell types  
902 based on signal intensity or YAP expression level in cells. Blue arrow represents cells with high YAP  
903 expression, yellow arrow represents cells with medium YAP expression, cells with a green arrow  
904 represents low YAP expression. White arrow indicates extra-nuclear staining in nematocysts. **B.** This  
905 panel depicts cell types based on the cellular arrangement. Orange arrows represent cells with duplet  
906 or quadruplet arrangement and red arrow represents cells arranged linearly. Red: YAP & Blue:  
907 Nucleus (Magenta indicates merged image). Immunofluorescence assay using the anti- *Hvul*\_YAP  
908 antibody of macerated cells at 60X. The red fluorescent dye shows Alexa 594 staining of YAP and  
909 the blue dye shows DAPI staining of nucleus. (Scale bar: 20  $\mu\text{m}$ )

910 **Figure 7: YAP positive cells are recruited early to the bud tip and are excluded from the region**  
911 **which are terminally differentiated in the late stages of bud development.** Immunofluorescence  
912 assay of *Hvul*\_YAP performed using anti-CheYki antibody for different budding stages (represented  
913 by two polyps for depicting each stage) of *Hydra* showing recruitment of YAP positive cells to the  
914 budding tip. **A.** Stage 3 shows early recruitment of YAP positive cells to the emerging bud with non-  
915 clustered cells at the distal tip with slight depletion at tip of the bud. **B.** at Stage 4, depletion of the  
916 YAP expressing is more prominent which gets further exaggerated at **C.** Stage 6 and **D.** Stage 9. Red:  
917 YAP & Blue: DAPI. (Scale bar = 50  $\mu\text{m}$ )

918 **Figure 8: YAP positive cells are recruited early to the regenerating tip in *Hydra*.**  
919 Immunofluorescence assay of *Hvul*\_YAP performed anti-CheYki antibody for head regenerating  
920 *Hydra* showing recruitment of YAP positive cells to the regenerating tip. The density of YAP  
921 positive cells can be seen increasing at the site of injury from 1 hr post-amputation (1 hpa). White  
922 arrows indicated in the zoomed-in image shows the generation of a new type of YAP expressing cells  
923 at the regenerating tip by 8 hpa as compared to cell population seen away from the tip or previous  
924 time points (green arrows) Red: YAP & Green: Actin. (Scale bar = 50  $\mu\text{m}$ )

A.

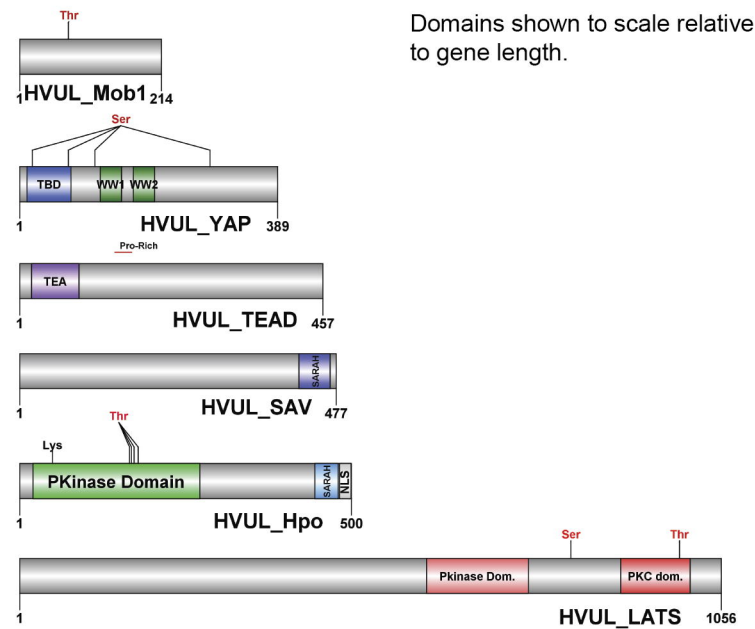

B.

| Gene      | %identity with Drosophila | %identity with Human |
|-----------|---------------------------|----------------------|
| Hvul_Hpo  | 56.34                     | 60.55                |
| Hvul_Sav  | 21.93                     | 24.41                |
| Hvul_Mob1 | 83.64                     | 84.11                |
| Hvul_LATS | 42.02                     | 41.66                |
| Hvul_YAP  | 34.05                     | 34.69                |
| Hvul_TEAD | 58.92                     | 65.12                |

C.

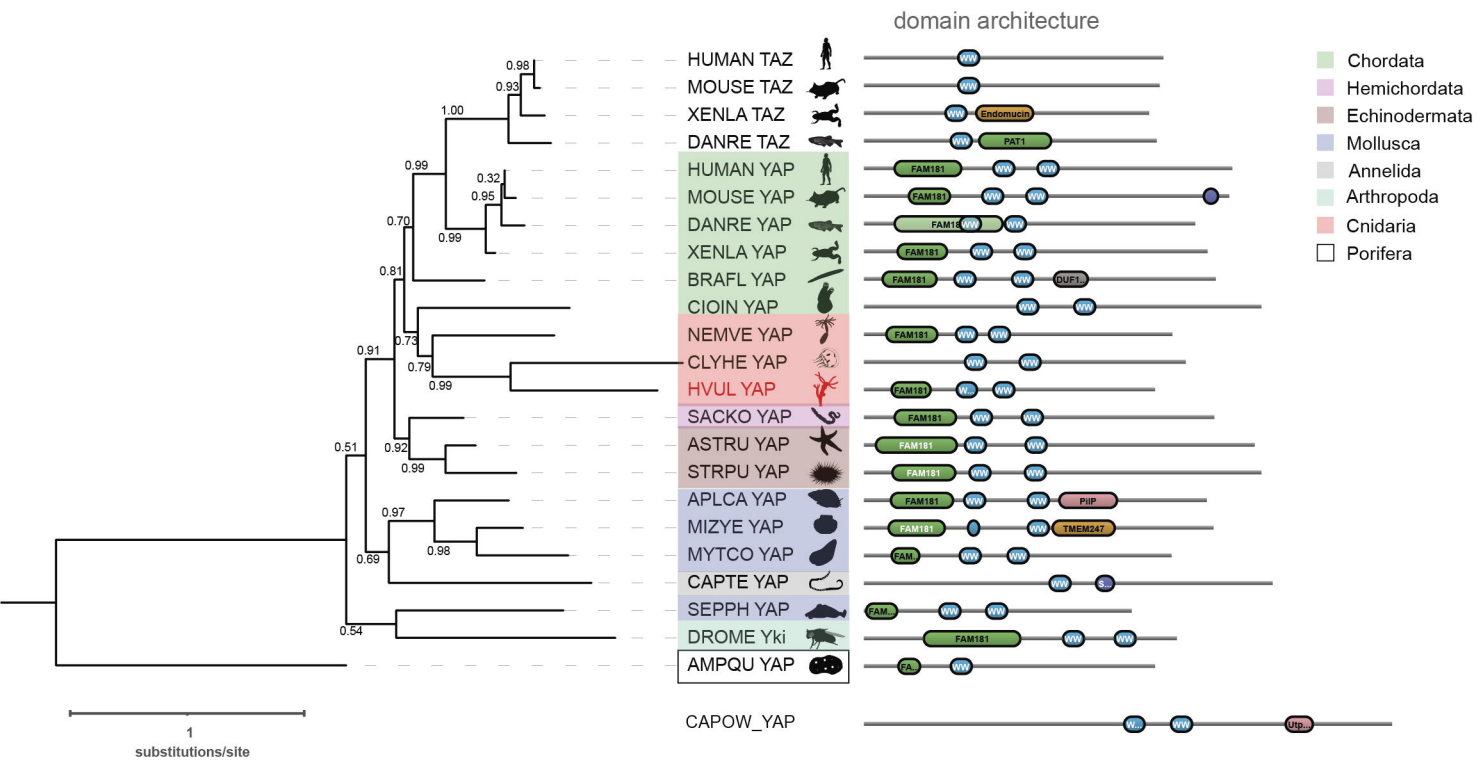



**A**500  $\mu\text{m}$ 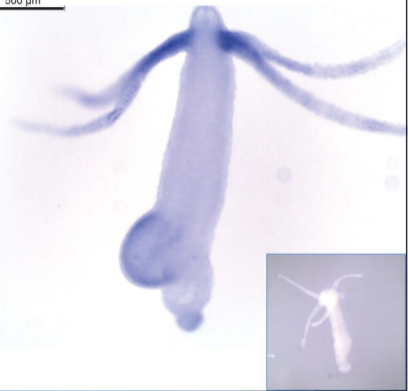**B**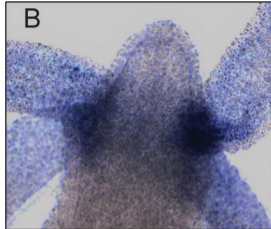**C**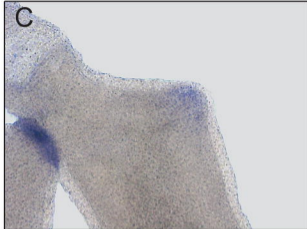**D**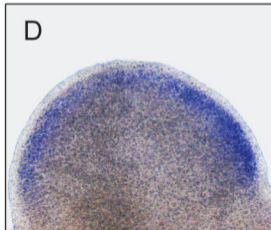**E**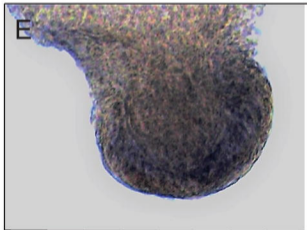



*Hvul\_hpo*

A.

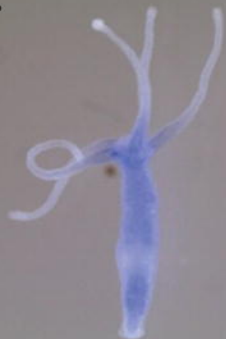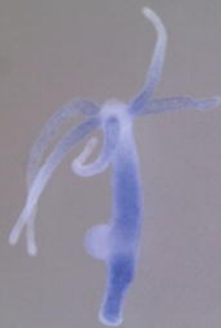

500  $\mu$ m

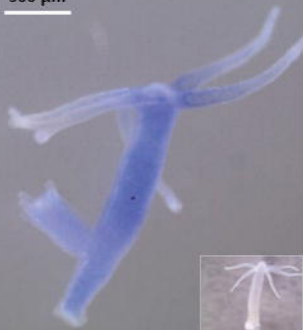

*Hvul\_mob*

B.

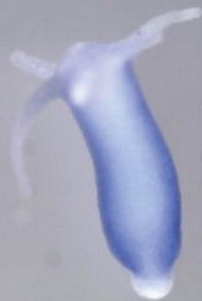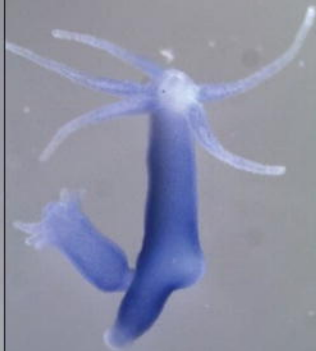

500  $\mu$ m

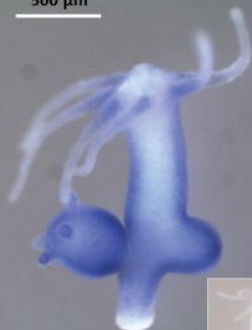

*Hvul\_sav*

C.

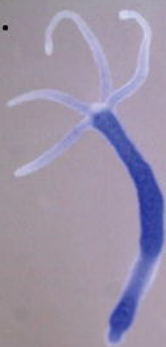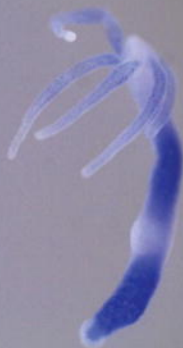

500  $\mu$ m

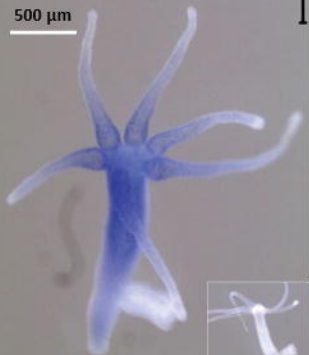

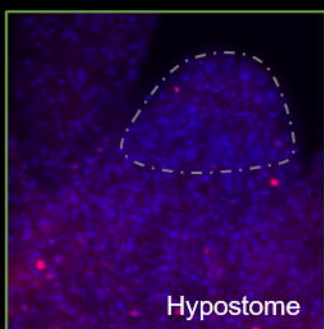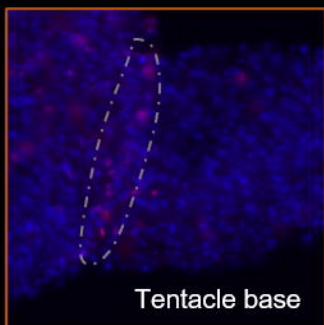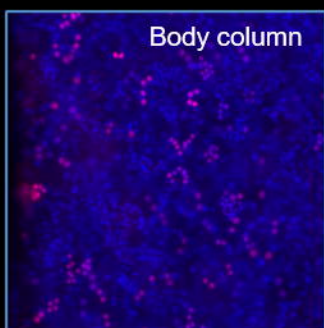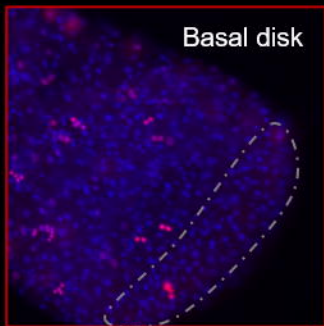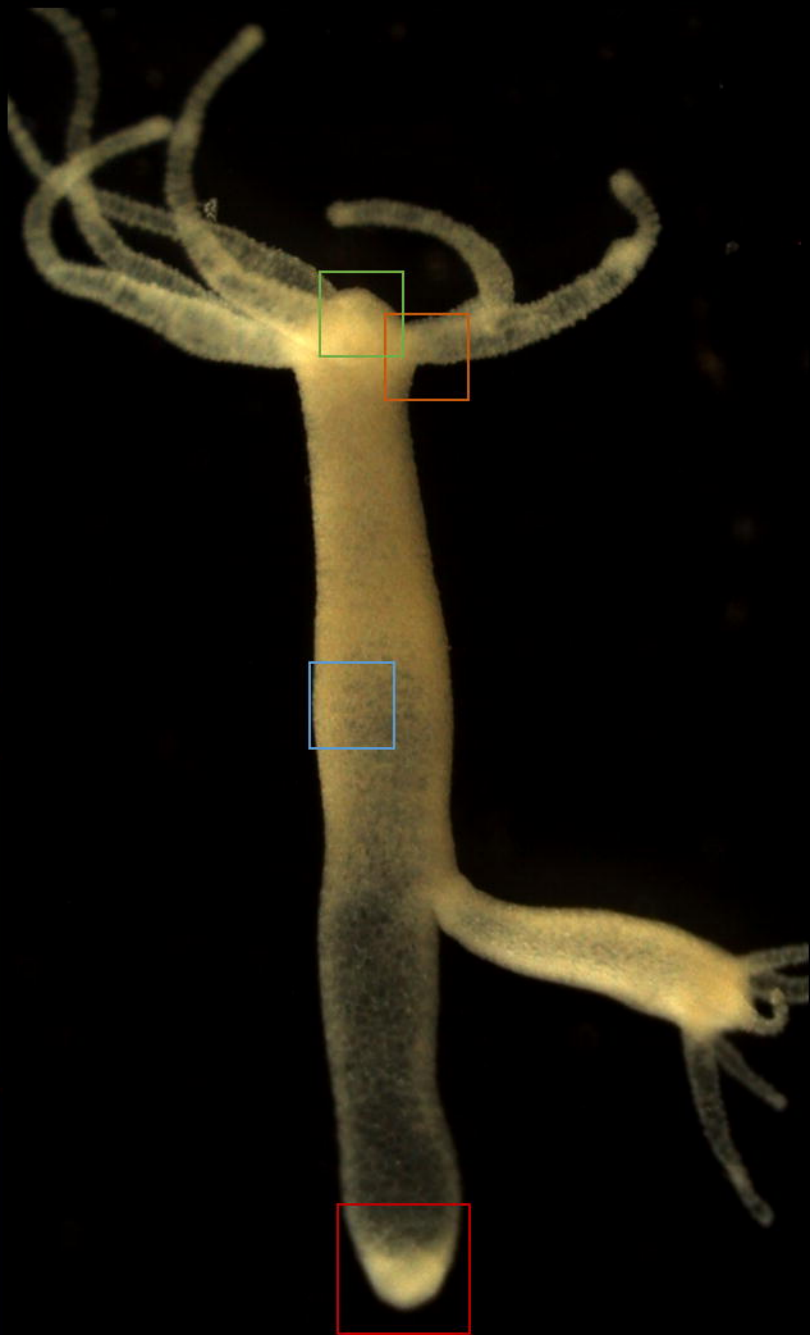

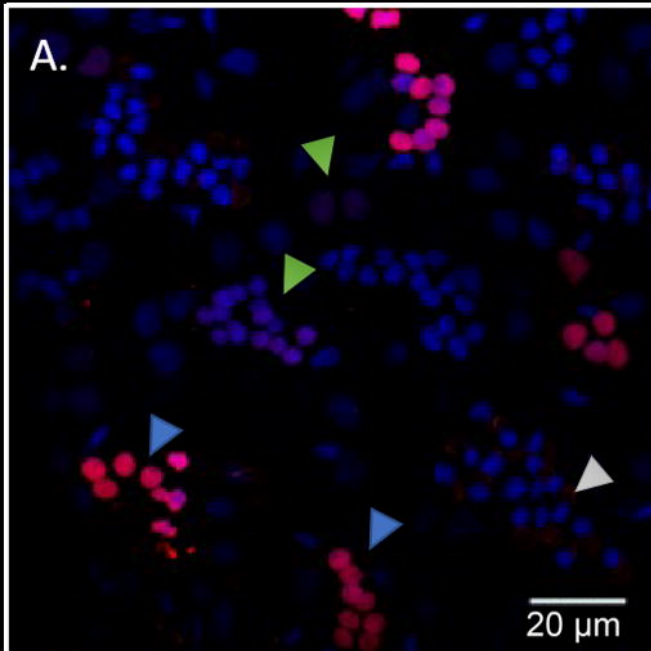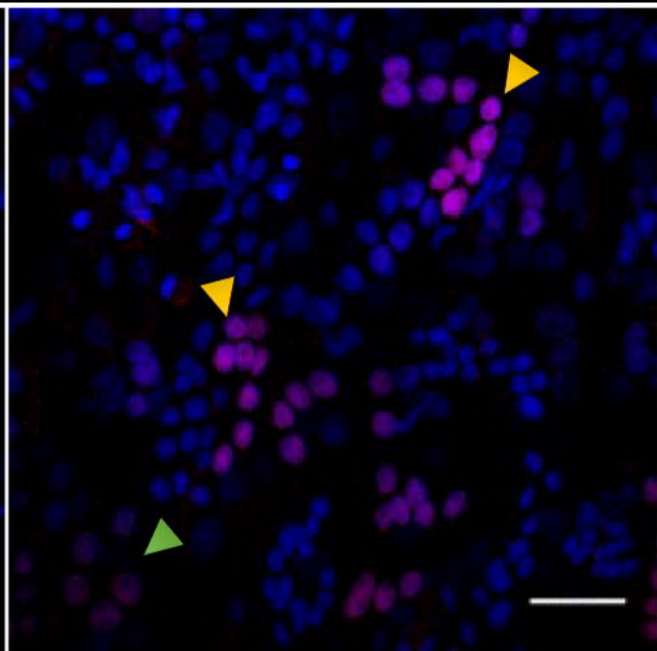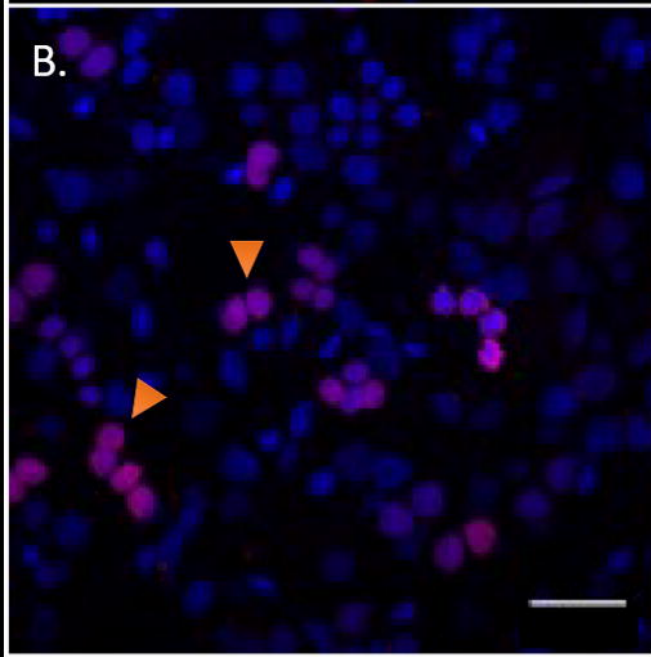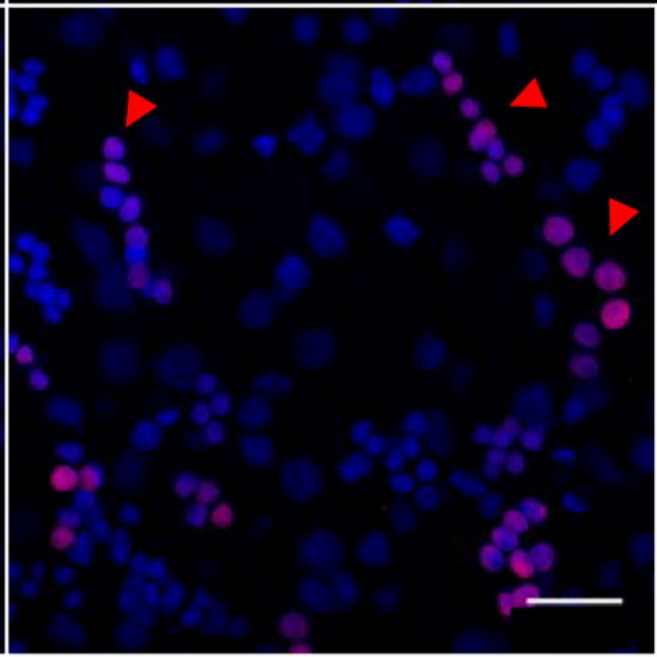

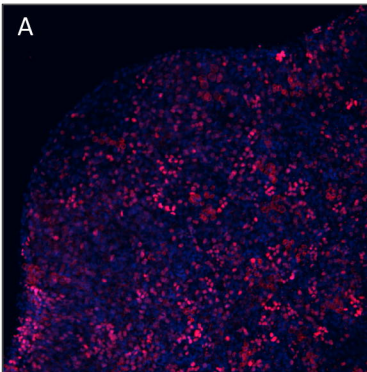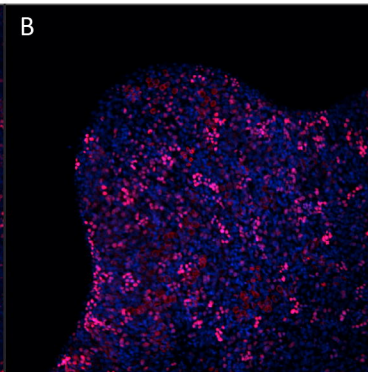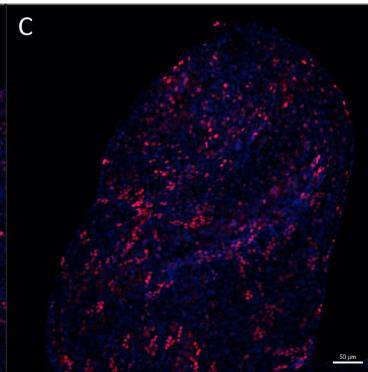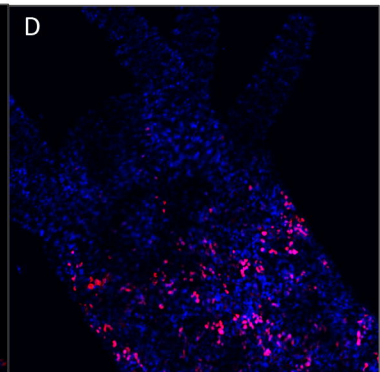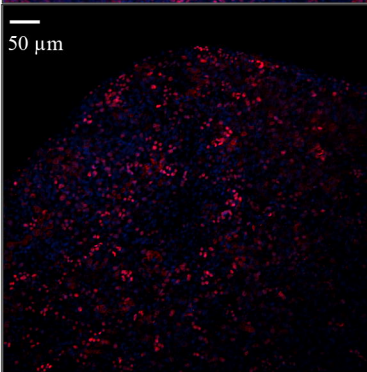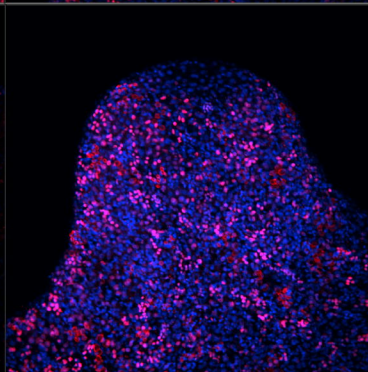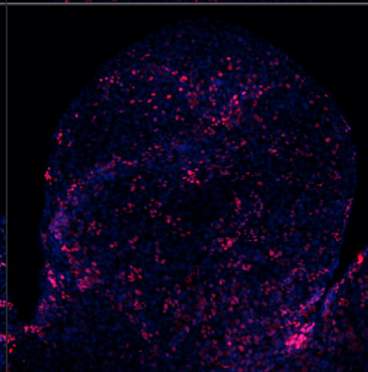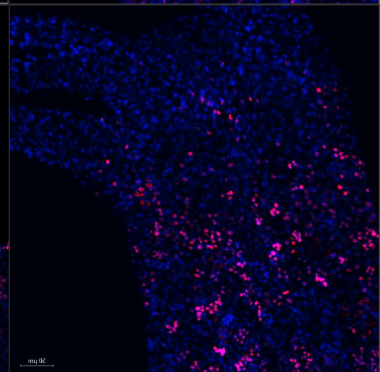

**Stage 3**

**Stage 4**

**Stage 6**

**Stage 9**

Actin + Hvu1\_YAP

Hvu1\_YAP

0 hpa

50  $\mu$ m

1 hpa

2 hpa

4 hpa

8 hpa

4 hpa

8 hpa

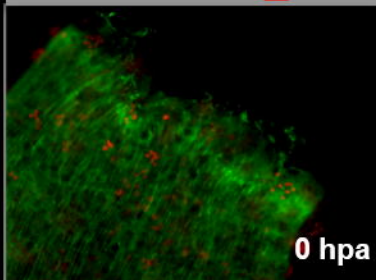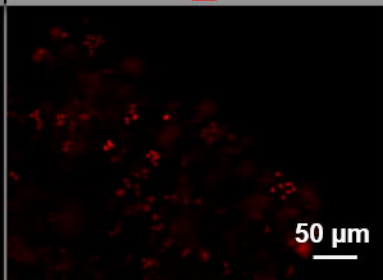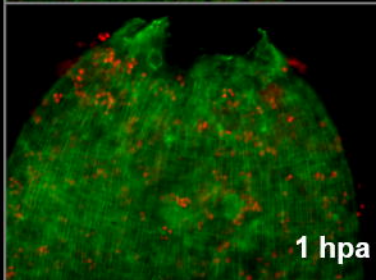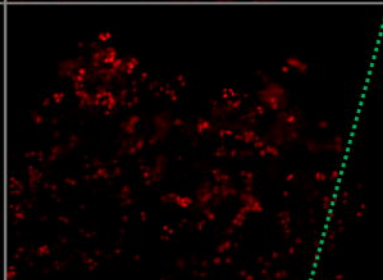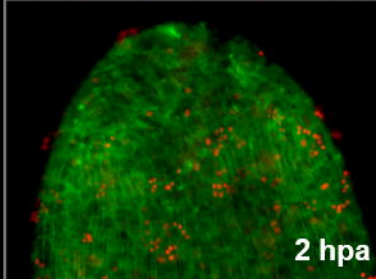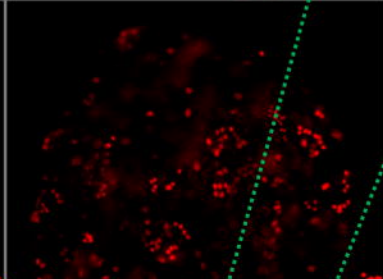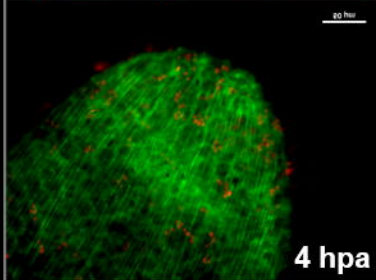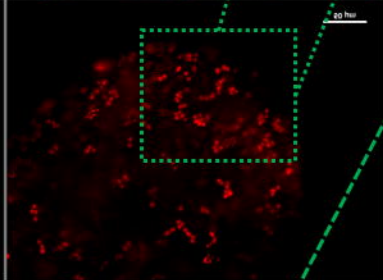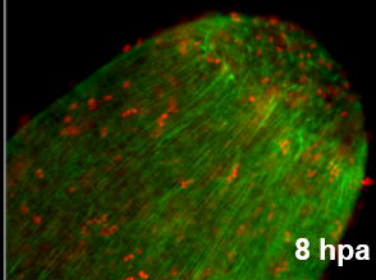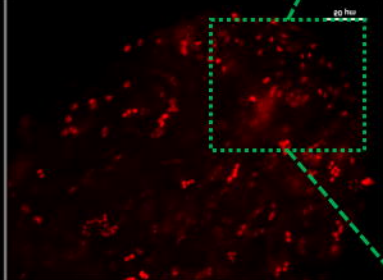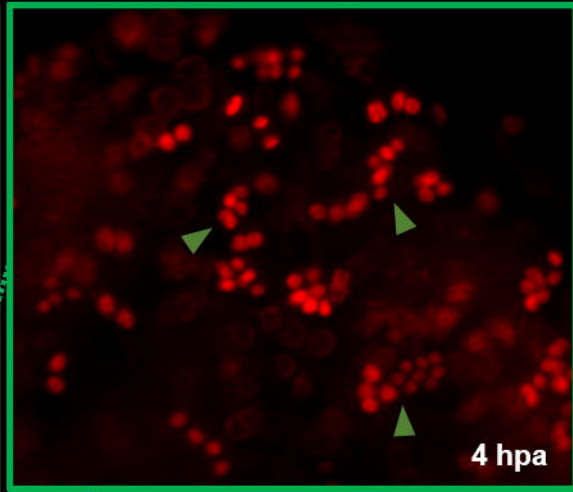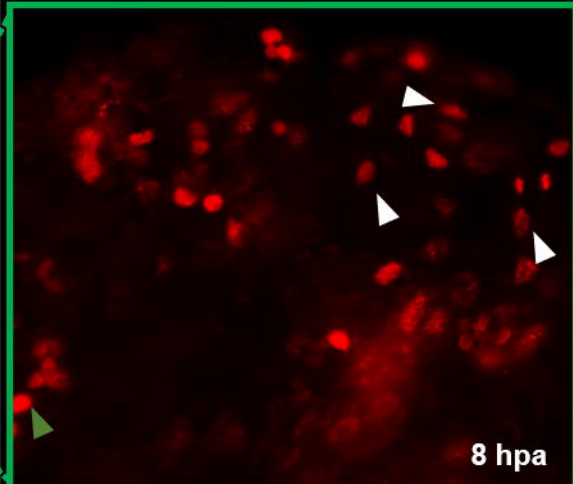

Source: https://www.biorxiv.org/content/10.1101/2021.03.24.436861v1.full.pdf
